# Supplementary material for: High Throughput Sequencing Identifies Misregulated Genes in the Drosophila Polypyrimidine Tract-Binding Protein (hephaestus) Mutant Defective in Spermatogenesis
Source: PLoS One. 2016 Mar 4;11(3):e0150768. doi: 10.1371/journal.pone.0150768 (PMC4778870; doi:10.1371/journal.pone.0150768)
Supplement: S1 Table — (XLSX) [file pone.0150768.s002.xlsx]

## Sheet: gene_exp
gene	log2(fold_change)	locus	Control	Heph2	gene_id
snRNA:U4:39B	#NAME?	2L:21212692-21220567	5.28332	0	FBgn0003930
snRNA:U4:38AB	inf	2L:19810733-19810875	0	8.38418	FBgn0003931
snRNA:U5:23D	#NAME?	2L:3043972-3055601	14.9436	0	FBgn0003934
Cp7Fc	#NAME?	X:8359790-8377918	5.97067	0	FBgn0014466
snoRNA:Me28S-A1322	inf	2R:7779596-7783025	0	272.618	FBgn0015543
snoRNA:Me28S-G764	#NAME?	3L:22861478-22871864	80.0624	0	FBgn0020518
CG17012	#NAME?	2L:2254174-2255050	1.07821	0	FBgn0031406
CG8960	#NAME?	3L:2197012-2198107	3.41491	0	FBgn0035315
CG14459	#NAME?	3L:22575146-22595828	2.08922	0	FBgn0037171
Tango8	#NAME?	2R:14166569-14244766	2.35664	0	FBgn0040737
tRNA:CR31946	#NAME?	2L:2187006-2187079	58.8554	0	FBgn0051946
tRNA:CR32449	inf	3L:21847193-21847265	0	98.9253	FBgn0052449
snoRNA:U49:66Da	#NAME?	3L:8594101-8595492	34.8381	0	FBgn0060292
snoRNA:Me28S-G3277a	#NAME?	2R:13586601-13590827	43.0392	0	FBgn0063375
snoRNA:U76:54Eb	inf	2R:13586601-13590827	0	90.8726	FBgn0063376
snoRNA:Me28S-A3407a	inf	2R:13586601-13590827	0	69.6607	FBgn0063385
snoRNA:Me18S-A28a	inf	2R:13586601-13590827	0	159.315	FBgn0063386
Rdh	#NAME?	3L:3818686-3841208	5.14171	0	FBgn0064227
snoRNA:Me28S-A982a	inf	2R:4982802-4985972	0	132.905	FBgn0082943
snoRNA:Me28S-A2634b	#NAME?	3L:1665142-1668677	162.946	0	FBgn0082945
snoRNA:Me18S-U1356c	#NAME?	3L:20446392-20457448	37.3089	0	FBgn0082947
snoRNA:Psi28S-3405b	#NAME?	3R:24425528-24431499	5.74059	0	FBgn0082959
snoRNA:Psi28S-3405a	#NAME?	3R:24425528-24431499	11.4812	0	FBgn0082960
snoRNA:Psi28S-1135b	inf	X:17037619-17042287	0	3.86393	FBgn0083011
snoRNA:Psi18S-996	inf	3L:259285-264378	0	3.30351	FBgn0083014
snoRNA:Psi18S-640e	inf	2L:20417060-20423034	0	7.20279	FBgn0083022
snoRNA:Psi18S-1347b	inf	2R:14027582-14033740	0	8.16744	FBgn0083053
snoRNA:Psi18S-110	#NAME?	3L:826709-833402	2.95233	0	FBgn0083057
CG34278	#NAME?	3R:12946200-12946476	2.42377	0	FBgn0085307
snoRNA:Or-CD1	inf	2R:18073482-18090178	0	27.8875	FBgn0086027
snoRNA:Me28S-G2173	#NAME?	2R:18493625-18495506	103.183	0	FBgn0086028
snoRNA:Me28S-A3365	#NAME?	2L:20350435-20365254	33.5451	0	FBgn0086040
snoRNA:Me28S-G980	#NAME?	X:1375829-1377446	279.857	0	FBgn0086042
snoRNA:Me18S-G1358b	#NAME?	3R:5167591-5185154	50.0811	0	FBgn0086054
snoRNA:Me28S-C788b	inf	3L:826709-833402	0	118.356	FBgn0086062
snoRNA:Me28S-G3113b	#NAME?	3L:826709-833402	53.8781	0	FBgn0086064
snoRNA:Or-CD11b	#NAME?	3L:3219123-3222960	105.771	0	FBgn0086071
snoRNA:Me18S-A1494	inf	3L:5660919-5741139	0	5.59529	FBgn0086073
snoRNA:Me18S-A1806	inf	3L:7632816-7632894	0	61.808	FBgn0086074
snoRNA:Me28S-A774b	#NAME?	3L:13016455-13017862	58.8554	0	FBgn0086078
Vm26Ac	#NAME?	2L:5958045-5958591	2.18087	0	FBgn0086266
snoRNA:Psi18S-1347c	#NAME?	2R:14027582-14033740	2.43664	0	FBgn0086600
snoRNA:Psi28S-2622	#NAME?	3L:1475428-1489547	5.74059	0	FBgn0086670
CG42455	inf	3L:9965342-9967123	0	1.79798	FBgn0259932
snoRNA:Me28S-U2134b	#NAME?	3R:1450185-1451679	43.0392	0	FBgn0260002
Map205	-7.23217	3R:27882313-27894162	6.65168	0.0442416	FBgn0002645
Vm26Aa	-6.73339	2L:5959699-5960340	56.0799	0.527052	FBgn0003979
Vm34Ca	-6.46079	2L:13411176-13411631	69.2784	0.786512	FBgn0003983
Cp36	-6.38348	X:8359790-8377918	21.1142	0.252903	FBgn0000359
CG42245	6.31809	3L:2631719-2641984	0.0445049	3.55093	FBgn0250911
CG32198	-6.25597	3L:18520089-18520500	12.1456	0.158922	FBgn0052198
osk	-6.15469	3R:4760852-4764123	1.75859	0.0246841	FBgn0003015
Cp38	-6.10595	X:8359790-8377918	15.1406	0.219821	FBgn0000360
CG11381	-6.04576	X:1097811-1099468	1.55375	0.0235195	FBgn0029568
yellow-g2	-5.67711	3L:2276549-2278038	4.11626	0.0804493	FBgn0035328
Vml	-5.65255	X:2170005-2171743	3.23691	0.0643491	FBgn0085362
CG6784	-5.45244	3R:19198645-19199766	27.7506	0.633761	FBgn0039074
Vm26Ab	-5.35061	2L:5957003-5957628	28.7006	0.703391	FBgn0003980
Fad2	-5.12822	3L:11016634-11017946	1.03861	0.0296965	FBgn0029172
Yp1	-5.09066	X:9947884-9949531	40.219	1.1803	FBgn0004045
Cp7Fb	-5.0812	X:8359790-8377918	1.32717	0.0392045	FBgn0014465
CG11598	-5.00239	3R:8460638-8462007	49.4058	1.54138	FBgn0038067
Vm32E	-4.98804	2L:11171228-11171665	8.96292	0.282423	FBgn0014076
dmrt93B	-4.85446	3R:16899728-16902520	3.68944	0.127533	FBgn0038851
CG4009	-4.81627	3R:12859682-12861740	1.11154	0.039453	FBgn0038469
Ory	-4.73088	YHet:229032-271450	1.2491	0.047039	FBgn0046323
CG9759	-4.23131	3R:9434474-9434968	2.131	0.113457	FBgn0038160
psd	-3.97324	2L:5963086-5964322	2.00304	0.127534	FBgn0086265
Cp19	-3.86518	3L:8722964-8723704	2.14534	0.147218	FBgn0000358
CG11131	-3.84906	3L:22892279-22893368	2.54583	0.176663	FBgn0037204
CG13813	-3.84582	3L:20224789-20238412	3.63363	0.252717	FBgn0036956
CG13114	-3.83276	2L:9545810-9547424	2.12144	0.148886	FBgn0032127
pxt	-3.7558	3R:13545173-13548677	1.23762	0.0916179	FBgn0038538
CG11854	-3.65873	3R:21067770-21070884	1.02988	0.0815454	FBgn0039299
CG32379	-3.60855	3L:7389454-7391309	2.32668	0.190746	FBgn0052379
CG33093	-3.5338	3R:18356415-18357644	7.61274	0.657299	FBgn0053093
Hsp70Bc	3.39902	3R:8334797-8337008	1.58212	16.6897	FBgn0013279
Or13a	-3.28022	X:15868457-15870739	1.21429	0.12499	FBgn0030715
CG13299	-3.18069	3L:6225022-6225424	8.76361	0.966499	FBgn0035694
Hsp70Bb	3.08546	3R:8331514-8334105	3.66043	31.0706	FBgn0013278
Gr97a	-3.05515	3R:22790865-22792194	1.53645	0.184852	FBgn0041224
alphaTub67C	-3.03044	3L:9674378-9676470	2.49285	0.305099	FBgn0087040
Dec1	-3.02831	X:7761228-7767255	4.09261	0.501636	FBgn0000427
Obp46a	-2.95829	2R:6198676-6199528	1.95209	0.251168	FBgn0033508
Yp2	-2.88635	X:9945048-9946669	39.857	5.39046	FBgn0005391
CG12009	-2.85572	3L:3294751-3298963	1.33677	0.184671	FBgn0035430
CheB38b	-2.83276	2L:20816548-20817262	3.0053	0.421833	FBgn0067311
Obp19c	-2.81627	X:20288947-20289991	4.79076	0.680177	FBgn0031111
CG17751	-2.80362	3R:15432975-15435045	15.7027	2.24906	FBgn0038717
gnu	-2.74256	3L:14795479-14796457	1.84533	0.275728	FBgn0001120
CG11659	-2.71572	3R:15601180-15603002	5.0402	0.767244	FBgn0038731
CG34267	-2.69526	3L:434257-540589	1.57604	0.243339	FBgn0085296
CG41527	-2.69526	U:3398110-3398437	1.70837	0.263771	FBgn0085670
fln	2.68072	3L:19982650-19984279	556.608	3568.84	FBgn0005633
dhd	-2.60637	X:5206405-5207155	30.0923	4.94152	FBgn0011761
CG8299	-2.60599	2R:11828205-11828988	10.3792	1.70484	FBgn0034052
Cpr66Cb	-2.51629	3L:8329771-8331699	1.41007	0.246469	FBgn0035875
Lcp3	-2.46079	2R:4322948-4323523	2.30014	0.417813	FBgn0002534
CG14545	-2.46079	3R:21676124-21677013	1.76435	0.320488	FBgn0040602
CG13627	-2.4465	3R:20538505-20543145	1.63124	0.29926	FBgn0039217
Hsp70Bbb	2.44483	3R:8328231-8330822	0.33926	1.84714	FBgn0051354
Ir75a	-2.42778	3L:17808761-17811021	1.36511	0.253707	FBgn0036757
yellow-e2	-2.40728	3R:9230830-9232689	2.7436	0.5172	FBgn0038151
TpnC4	2.38166	2R:1384183-1437059	441.182	2299.17	FBgn0033027
CG13998	-2.37333	2L:5956511-5956805	1.80356	0.348085	FBgn0040949
CG42521	-2.33586	3L:10616165-10616676	25.6056	5.07191	FBgn0260396
Lip3	2.30506	3R:9195390-9197626	4.91255	24.2772	FBgn0023495
Obp56a	-2.27396	2R:15585227-15586016	106.243	21.9669	FBgn0034468
CG18258	-2.26512	X:17106360-17108010	53.3439	11.0973	FBgn0030827
CG33462	2.2641	2R:11584308-11585515	0.236493	1.136	FBgn0053462
snoRNA:snR38:54Ec	2.21163	2R:13586601-13590827	43.0392	199.357	FBgn0063373
snoRNA:Psi18S-1377a	2.21163	3R:26032239-26034742	2.95233	13.6752	FBgn0086665
ninaD	2.21147	2L:18081629-18083608	23.545	109.048	FBgn0002939
CG14957	2.20674	3L:3187562-3189747	28.6058	132.054	FBgn0035412
Act88F	2.20579	3R:11265709-11267895	1105.51	5100.01	FBgn0000047
CG32185	2.19956	3L:17480222-17504793	3.92784	18.0421	FBgn0052185
Jon66Cii	-2.18069	3L:8385957-8386749	1.01479	0.223832	FBgn0035887
CG33272	-2.18069	3L:11503422-11503689	2.07729	0.45819	FBgn0053272
snoRNA:Me28S-U2134a	-2.18069	3R:1450185-1451679	350.568	77.325	FBgn0086051
Hsp70Ab	2.16724	3R:7784274-7788523	0.213594	0.959385	FBgn0013276
MtnB	2.14905	3R:16328959-16329321	44.8427	198.893	FBgn0002869
CG31681	-2.14592	2L:2285173-2286873	1.1728	0.264995	FBgn0051681
dro3	2.14186	3L:3314995-3315356	126.083	556.445	FBgn0052283
yl	-2.13998	X:14087251-14093996	1.21931	0.276641	FBgn0004649
Neu2	-2.1103	3L:21481952-21483101	0.90204	0.208912	FBgn0037085
Hsp68	2.10592	3R:19880139-19883029	52.856	227.531	FBgn0001230
CG13678	2.1006	3L:8215242-8216051	0.54332	2.33023	FBgn0035859
CG14168	2.07556	3L:9781675-9790626	4.65409	19.6174	FBgn0036044
gammaTub37C	-2.07377	2L:19183969-19185724	0.842708	0.200175	FBgn0010097
snoRNA:Psi28S-1192d	-2.07377	X:17037619-17042287	43.0759	10.2322	FBgn0082998
Yp3	-2.05521	X:13653577-13655200	33.948	8.16833	FBgn0004047
CG1894	-2.01932	3R:24310278-24311720	6.22561	1.5357	FBgn0039585
CG17191	2.00882	3R:22844329-22845473	1.46721	5.90482	FBgn0039473
Cyp6a19	-1.99482	2R:10765292-10768877	0.99875	0.250586	FBgn0033979
CG12057	1.98339	X:9085705-9086582	33.47	132.347	FBgn0030098
Cyp4d21	-1.97308	2L:7605599-7607703	28.4056	7.23518	FBgn0031925
CG5890	-1.97004	3R:21692821-21695514	5.69477	1.45357	FBgn0039380
CG17097	-1.96168	2L:10646434-10650152	549.878	141.17	FBgn0032275
Cda9	-1.95829	2R:13016337-13017818	0.965925	0.248564	FBgn0034197
CG42680	-1.95829	2L:14587987-14588234	6.26113	1.61119	FBgn0261566
CG33926	-1.95288	3L:9436363-9439480	59.0479	15.2521	FBgn0053926
CG7299	-1.94449	2L:10683760-10684407	10.0058	2.59957	FBgn0032282
Sse	-1.93968	3L:5652793-5655341	0.831696	0.216802	FBgn0035627
CG16733	1.936	3R:5077574-5078687	0.640712	2.45164	FBgn0037665
CG9826	1.92942	2R:18728357-18729988	0.979233	3.72993	FBgn0034784
CG7968	1.92899	2L:13835566-13898715	10.7045	40.7617	FBgn0028532
CG14567	1.9178	3L:21730861-21731434	34.9973	132.236	FBgn0037126
yellow-g	-1.91623	3L:2269876-2272691	6.75706	1.79026	FBgn0041709
MED9	1.91305	2R:14054731-14055885	9.53798	35.9204	FBgn0260401
Fst	1.90415	3R:5463903-5475982	26.0406	97.4669	FBgn0037724
Osi23	-1.90385	3R:26269870-26271031	1.34485	0.359384	FBgn0039771
CR14499	-1.89535	2R:14071885-14080341	136.526	36.6994	FBgn0034317
Sox21a	-1.8879	3L:14097353-14100174	0.88518	0.239175	FBgn0036411
Bace	1.87836	2L:8491867-8506845	56.6354	208.224	FBgn0032049
CG41497	-1.87583	U:1683805-1684225	6.70819	1.82778	FBgn0085658
mtrm	-1.87318	3L:8404952-8414380	4.35845	1.18974	FBgn0010431
sun	1.86584	X:15738529-15743273	283.939	1034.9	FBgn0014391
CG33290	-1.86291	3L:21535458-21536112	52.6603	14.4774	FBgn0053290
CG40551	-1.86162	U:2791978-2792692	4.783	1.31613	FBgn0085496
CG9616	1.85788	3R:10070525-10071193	14.3505	52.017	FBgn0038214
Dpt	1.84192	2R:14753269-14753765	27.4403	98.3699	FBgn0004240
CG3819	-1.83276	3L:18913620-18915206	6.87627	1.93035	FBgn0036833
CG34247	-1.83276	3L:16254356-16254676	3.88938	1.09185	FBgn0085276
Ir75d	-1.8304	3L:18898473-18907250	2.04058	0.573782	FBgn0036829
CG4500	1.82949	2L:14027009-14029372	1.13117	4.0203	FBgn0028519
CG8100	1.8283	3L:14076727-14078834	2.48075	8.80962	FBgn0036410
CG31468	1.81866	3R:19525542-19526076	785.154	2769.66	FBgn0047351
CG15169	-1.81812	2L:18991074-18992112	1.25207	0.355075	FBgn0032734
CG32201	-1.8139	3L:18593247-18611031	11.3549	3.22957	FBgn0052201
Cyt-c-p	1.80165	2L:16680045-16729636	1617.27	5638.13	FBgn0000409
CG7579	-1.79701	3L:15674768-15676397	9.19676	2.64655	FBgn0036528
CG7763	1.79313	2R:7299446-7317146	5.84251	20.2482	FBgn0040503
CG1946	1.79226	2R:3602487-3604296	1.68662	5.84172	FBgn0033216
TotA	1.79028	3R:16696757-16697427	269.687	932.799	FBgn0028396
lectin-33A	1.78264	2L:11002071-11002740	13.202	45.4223	FBgn0040096
Obp50e	-1.76565	2R:10262076-10262836	1.15637	0.340083	FBgn0033931
CheB98a	-1.76565	3R:24632447-24633155	1.1839	0.34818	FBgn0261289
CG31872	-1.7638	2L:10639945-10643492	218.309	64.286	FBgn0051872
Jon65Aii	1.75907	3L:6045449-6046291	17.1298	57.9807	FBgn0035666
pncr015:3L	-1.75184	3L:7399422-7399719	5.70159	1.69293	FBgn0063083
Obp99b	1.74277	3R:25541972-25542532	596.447	1996.17	FBgn0039685
CG42587	1.73629	2L:14744896-14745210	9.38398	31.2654	FBgn0260955
CG14125	1.72785	3L:11968009-11968859	71.1823	235.779	FBgn0036232
CG7298	-1.72756	3L:20195169-20196786	5.16566	1.55984	FBgn0036948
swa	-1.72383	X:6257450-6259742	1.195	0.36178	FBgn0003655
CG31274	1.72183	3R:12818755-12821810	0.348319	1.14894	FBgn0051274
CG31463	1.72158	3R:4118072-4119331	2.52497	8.32728	FBgn0051463
TwdlW	-1.72125	3R:12966919-12968120	1.28877	0.390864	FBgn0038487
CG1308	-1.71557	3L:4193992-4204338	1.62708	0.495417	FBgn0035507
CG1942	1.71352	2R:3600127-3601695	8.3921	27.5228	FBgn0033215
CG4692	1.70747	2R:20485517-20487344	1157.92	3781.63	FBgn0035032
CG7025	1.70506	2L:7691108-7692683	3.66337	11.9441	FBgn0031930
Lsp2	1.70134	3L:12122492-12124796	155.407	505.388	FBgn0002565
snoRNA:Me28S-C3351	-1.70128	3L:3219123-3222960	216.275	66.5074	FBgn0086069
Cpr30B	-1.69526	2L:9542946-9543478	2.06491	0.637644	FBgn0032125
snoRNA:Psi28S-1135c	-1.69526	X:17037619-17042287	13.2083	4.07872	FBgn0083010
CG34336	-1.69526	X:3763019-3763797	3.28955	1.01581	FBgn0085365
CG15048	-1.69483	X:18414862-18416478	1.22881	0.379568	FBgn0030935
Hsp67Bc	1.68441	3L:9364817-9365417	29.6514	95.3024	FBgn0001229
levy	1.67628	2R:19435762-19442241	942.65	3012.74	FBgn0034877
CG11529	-1.67373	3L:12191006-12191870	4.2944	1.34605	FBgn0036264
CG11152	-1.67289	4:857609-865132	1.29957	0.407576	FBgn0039937
obst-I	-1.66284	3L:2267869-2268529	2.05627	0.649404	FBgn0052304
CG15533	1.65562	3R:26254547-26257091	3.94251	12.4212	FBgn0039768
CG16998	-1.65344	3L:7532159-7532936	2.529	0.803921	FBgn0035795
Hsp26	1.6528	3L:9369517-9370527	396.389	1246.42	FBgn0001225
CG14375	1.64789	3R:9214778-9220912	114.095	357.544	FBgn0038147
CG11015	1.6475	2L:6557799-6559308	508.082	1591.77	FBgn0031830
Obp56h	-1.64514	2R:15703081-15703544	20.9861	6.70959	FBgn0034475
CG9698	-1.64182	3R:26340545-26342641	0.784356	0.251348	FBgn0039784
CG41020	-1.64126	U:7798898-7799863	7.18471	2.30324	FBgn0085556
CG9466	1.63718	2L:8772947-8776261	7.62909	23.7308	FBgn0032068
snoRNA:Psi18S-1347a	1.62844	2R:14027582-14033740	3.12601	9.66493	FBgn0083054
Pcp	1.62667	2L:7014860-7023940	0.412194	1.27285	FBgn0003046
CG11570	1.62667	3L:11949913-11950591	0.314711	0.971824	FBgn0036230
CG14368	1.62667	3R:9451015-9451351	0.639473	1.97469	FBgn0038162
CG14244	1.62667	3R:22552000-22552246	0.762347	2.35412	FBgn0040607
tRNA:CR31356	1.62667	3R:8032296-8032368	64.071	197.851	FBgn0051356
mir-100	1.62667	2L:18471433-18471512	37.3089	115.21	FBgn0064160
snoRNA:Me28S-U1848	1.62667	2R:10509110-10512013	69.6762	215.16	FBgn0082926
snoRNA:Me18S-U1356a	1.62667	3L:20446392-20457448	37.3089	115.21	FBgn0082949
snoRNA:Psi18S-1854b	1.62667	X:17037619-17042287	2.95233	9.11678	FBgn0083041
snoRNA:Me28S-U1688	1.62667	X:9822298-9825012	5.7225	17.671	FBgn0086044
CheB53b	1.62667	2R:12355713-12356439	0.362949	1.12079	FBgn0261293
Or45b	-1.62126	2R:5447102-5448573	3.69213	1.20013	FBgn0033422
CG15023	-1.62126	3L:4460620-4461339	0.897776	0.291824	FBgn0035548
snoRNA:Psi28S-3385a	-1.62126	3R:1421085-1426891	41.7043	13.5561	FBgn0082962
CG11592	1.62089	2L:283384-291010	3.63914	11.1927	FBgn0025686
Npc2d	1.62021	3R:5881077-5881805	15.668	48.1668	FBgn0037782
CG8329	-1.61937	3L:9624933-9672203	74.8889	24.3747	FBgn0036022
Fbp2	1.61648	2L:9426859-9427835	153.155	469.614	FBgn0000640
CG30479	1.61535	2R:10559439-10601126	3.54249	10.8537	FBgn0050479
CG11674	-1.61434	X:14095404-14119917	1.13424	0.370461	FBgn0030551
CG17843	-1.60898	3R:17739470-17741268	51.6326	16.9267	FBgn0038919
Acp36DE	-1.60869	2L:18320100-18392575	550.65	180.556	FBgn0011559
fit	-1.60772	3R:17709639-17710176	69.562	22.8245	FBgn0038914
CG34002	-1.60541	3L:17851573-17853582	22.4846	7.38938	FBgn0054002
Tsp42Ep	1.60242	2R:2942217-2945040	6.04761	18.3637	FBgn0033137
CG15617	1.60203	2R:12632727-12634067	102.26	310.431	FBgn0034151
Npc2c	-1.59572	3R:5886018-5886858	3.24995	1.07527	FBgn0037783
CG31832	-1.59572	2L:15017153-15032191	2.47931	0.820294	FBgn0051832
CG3321	1.59288	3R:10152745-10153473	912.183	2751.6	FBgn0038224
Cyp28c1	-1.58603	X:11733642-11735391	7.21712	2.40393	FBgn0030339
CG9701	-1.58243	3L:16726673-16732471	67.7038	22.6075	FBgn0036659
CG9468	1.57754	2L:8777659-8781251	17.7639	53.0181	FBgn0032069
CG15434	1.5763	2L:4454664-4455160	63.8165	190.303	FBgn0040705
CG15422	1.57328	2L:4005055-4005370	54.2548	161.451	FBgn0031579
CG5107	1.57272	3R:21330934-21331640	106.407	316.525	FBgn0039342
CG7130	1.56763	3L:22068155-22068856	18.1803	53.8898	FBgn0037151
bxd	-1.56229	3R:12567846-12598911	1.01353	0.343196	FBgn0020556
Mur82C	-1.55943	3R:319125-383789	4.5336	1.53819	FBgn0037260
CG18110	1.55741	3R:25494870-25496972	0.437987	1.2891	FBgn0039677
CG7631	1.54421	2L:15628683-15629552	4.77101	13.9144	FBgn0028945
Jon66Ci	-1.54326	3L:8384641-8385479	8.77296	3.01009	FBgn0035886
snoRNA:Me28S-A2958	-1.54326	2L:16400168-16450500	29.8218	10.2322	FBgn0086037
CG17121	-1.54093	3R:18870385-18873910	21.9662	7.54899	FBgn0039043
Jon99Fi	-1.54044	3R:26314686-26315625	81.6472	28.0687	FBgn0039778
LvpL	1.53887	2R:4343413-4345390	10.7092	31.1174	FBgn0002571
BG642163	-1.53758	2L:4641295-4642747	281.75	97.0522	FBgn0083938
CG8483	-1.5373	3R:9034469-9040187	83.2155	28.6702	FBgn0038126
to	-1.53683	3R:21065901-21067175	17.1712	5.91791	FBgn0039298
lbe	-1.53627	3R:17267313-17272042	1.1923	0.411075	FBgn0011278
CG10405	1.53616	3R:12280286-12281522	2.40761	6.98256	FBgn0038431
CG13962	1.53585	2L:19813744-19814536	13.5612	39.3219	FBgn0032824
CG13618	-1.53439	3R:20350521-20353261	44.4472	15.3443	FBgn0039203
CG33494	1.53356	3R:21319280-21320883	34.8786	100.973	FBgn0053494
Hand	1.53034	2L:10292780-10295299	13.8748	40.0778	FBgn0032209
CG32230	1.52824	3L:23332425-23334706	2343.02	6758.06	FBgn0052230
CG15635	-1.52522	2L:4642997-4646472	28.4831	9.89577	FBgn0031617
CG14893	-1.5247	3R:12446550-12448424	7.46547	2.59465	FBgn0038451
CG5084	-1.52308	2R:13906146-13907267	2.74102	0.953719	FBgn0034288
jumu	-1.52297	3R:6175905-6187343	4.72412	1.64385	FBgn0015396
CG34187	-1.52017	2R:11180438-11182593	10.5686	3.68468	FBgn0085216
CG2111	-1.5151	X:10523347-10603712	1.66902	0.583943	FBgn0030223
CG6663	-1.51506	3L:20314116-20315420	678.261	237.312	FBgn0036969
CG6463	1.51096	3L:10686276-10687206	236.555	674.181	FBgn0047038
CG13814	-1.51083	3L:20249470-20249785	8.26025	2.89859	FBgn0036960
CheA84a	-1.50849	3R:4029916-4030552	6.93429	2.43726	FBgn0261290
CG13036	1.50803	3L:16384221-16384781	2.24703	6.39101	FBgn0036626
Obp99c	1.50745	3R:25508223-25512504	2111.93	6004.35	FBgn0039682
CG13931	-1.50578	3L:1701376-1702401	2.81178	0.99014	FBgn0035258
CG17145	-1.50261	3L:20214915-20216068	0.839948	0.296429	FBgn0036953
Fbp1	1.49979	3L:14087685-14091156	62.2965	176.176	FBgn0000639
CG7300	-1.49452	2L:10695208-10698024	3.44303	1.22193	FBgn0032286
CG11413	1.49339	2R:20419122-20446273	245.706	691.783	FBgn0035022
AttB	1.48976	2R:10636727-10640774	11.5712	32.4968	FBgn0041581
CG18284	-1.48862	2L:10643984-10645812	175.153	62.4165	FBgn0043825
CG7181	1.48485	3L:21532065-21532547	1136.1	3179.81	FBgn0037097
CG8693	1.48427	2R:4346328-4348389	14.1982	39.723	FBgn0033294
l(1)G0230	1.48312	X:10107004-10108274	651.476	1821.22	FBgn0028342
CG13215	1.47625	2R:7126998-7127619	5.16149	14.3606	FBgn0033592
CG9463	1.47504	2L:8765358-8768708	3.12403	8.68456	FBgn0032066
CG11619	-1.47466	3L:18979158-18981258	6.46294	2.32548	FBgn0036836
Osi8	-1.47287	3R:2080996-2082114	1.02949	0.370892	FBgn0037415
CG34288	1.47225	3R:18272484-18272985	24.4328	67.7899	FBgn0085317
CG5548	1.47114	X:14957944-14958597	229.973	637.581	FBgn0030605
CG34329	1.46898	X:18944505-18945010	25.9827	71.9268	FBgn0085358
CG34295	-1.46578	3R:24615338-24616205	4.66068	1.68736	FBgn0085324
CG17681	1.46066	2L:18153416-18154410	1.44585	3.97948	FBgn0032668
RNaseMRP:RNA	1.46066	3R:19549085-19578552	2.75032	7.56981	FBgn0065098
CG9090	1.45752	2R:16166560-16168629	544.895	1496.48	FBgn0034497
CG11762	-1.45675	3R:4551200-4552271	2.50879	0.913987	FBgn0037618
CG9430	1.45674	2R:2606120-2607038	0.268621	0.737333	FBgn0033097
CG13615	-1.45425	3R:20216313-20217449	1.47991	0.540084	FBgn0039199
ImpL1	1.44959	3L:13375856-13377099	0.776052	2.11963	FBgn0001256
CG14851	-1.44372	3R:10388083-10388542	1.75493	0.645146	FBgn0038240
CG7077	1.44294	3R:18177964-18181986	26.188	71.1983	FBgn0038946
CG14610	-1.44237	3R:2969480-2969885	22.6819	8.34607	FBgn0037477
CG9702	-1.44215	3R:26405150-26407839	22.2887	8.20263	FBgn0039787
Lsp1alpha	1.44194	X:12384415-12386933	10.1006	27.4419	FBgn0002562
CG13247	-1.43746	3L:20363665-20368995	1.22383	0.451859	FBgn0036979
CG7526	-1.43433	3L:7555710-7562599	1.91903	0.710077	FBgn0035798
snoRNA:Psi28S-3305c	1.43402	3R:24425528-24431499	8.3442	22.546	FBgn0082974
snoRNA:Psi28S-1060	1.43402	X:6635569-6638290	8.77986	23.7231	FBgn0083013
CG33177	-1.43222	X:14975581-14976226	1.77584	0.658053	FBgn0053177
CG15369	1.43158	X:9110925-9111401	24.617	66.4024	FBgn0030105
CG15120	1.43141	2R:15385258-15388801	3.89258	10.4987	FBgn0034454
GstS1	1.4303	2R:12980757-12984935	476.959	1285.42	FBgn0010226
CG2150	1.43027	3R:27589025-27590488	1.22093	3.29036	FBgn0003065
CG13315	1.42888	3L:9089975-9090596	1500.41	4039.66	FBgn0040827
CG3397	1.4283	3R:7808819-7810263	17.2133	46.3262	FBgn0037975
CG34447	-1.42626	2L:2418421-2420010	27.1228	10.0922	FBgn0085476
iotaTry	1.42504	2R:7244226-7245041	10.4286	28.0029	FBgn0015001
CG33306	1.42459	2L:13835566-13898715	17.0343	45.7264	FBgn0053306
CG40583	-1.42169	U:4408204-4409285	2.21126	0.825404	FBgn0085498
Neb-cGP	1.41933	X:10354776-10355335	1155.93	3091.67	FBgn0083167
CG11669	1.41876	2R:4357053-4361448	31.6995	84.7506	FBgn0033296
CG3621	1.4178	X:2066559-2067173	237.161	633.643	FBgn0025839
Mur29B	-1.41747	2L:8352199-8355173	44.9469	16.8267	FBgn0051901
l(1)G0156	1.41565	X:19413147-19415843	140.701	375.36	FBgn0027291
CG5150	1.41494	3L:5588645-5590452	4.48019	11.9464	FBgn0035620
CG33288	-1.40924	3L:21375623-21426267	2.99796	1.12876	FBgn0053288
CG8093	1.40789	2R:11101836-11103105	49.1885	130.521	FBgn0033999
CG14127	-1.40728	3L:11874483-11876646	1.11684	0.421073	FBgn0036219
CG7630	1.40514	3L:17418587-17419382	1608.59	4260.26	FBgn0040793
CG11637	1.4045	3L:18885482-18891390	0.55558	1.47076	FBgn0036822
snoRNA:Me28S-G3253	1.40428	3L:9502989-9504642	149.22	394.962	FBgn0086075
Acp54A1	-1.40344	2R:13021027-13021168	40266.7	15221.8	FBgn0083936
CG34166	1.40014	2L:14743252-14743859	2128.69	5618.18	FBgn0085195
CG14695	-1.39799	3R:6704125-6704995	3.77575	1.43273	FBgn0037850
Ugt86Dc	-1.39666	3R:6980376-6982235	2.92593	1.11129	FBgn0040257
CG33965	1.3945	3L:1232903-1233965	1.05132	2.7639	FBgn0053965
CG31446	1.39385	3R:11518810-11519920	14.815	38.9308	FBgn0051446
Jon25Bi	1.39226	2L:4954070-4955353	32.188	84.4903	FBgn0020906
CG7304	-1.39219	3L:15671332-15674570	8.82221	3.36114	FBgn0036527
CG6690	-1.39016	3R:17737537-17739313	26.8825	10.2563	FBgn0038918
CoVa	1.3855	3R:7640927-7646021	1157.59	3024.35	FBgn0019624
Hsp27	1.38542	3L:9377164-9378384	86.5643	226.148	FBgn0001226
FucTA	-1.3846	3L:15140239-15151684	7.4821	2.86561	FBgn0036485
CG18624	1.3807	X:7787085-7787829	541.344	1409.63	FBgn0029971
CG4017	1.37958	2L:9767058-9768729	0.814425	2.11907	FBgn0032143
CG6071	-1.37877	3L:11636042-11639133	21.0966	8.11263	FBgn0036186
ATPsyn-d	1.37765	3R:14920719-14921792	992.615	2579.25	FBgn0016120
CG17738	-1.37333	3R:8084470-8128509	20.5857	7.94608	FBgn0038009
CG34225	-1.37333	2R:7132948-7133263	0.750932	0.289859	FBgn0085254
CG34280	-1.37333	3R:13220920-13229440	0.967375	0.373406	FBgn0085309
CG41281	-1.37333	3RHet:1016922-1017221	1.72278	0.664991	FBgn0085597
snoRNA:Psi28S-2876	-1.37333	X:17037619-17042287	22.9623	8.86345	FBgn0086671
CG17169	-1.37332	XHet:63489-80010	2.07904	0.802513	FBgn0040514
Hsp23	1.37201	3L:9374983-9375867	175.562	454.407	FBgn0001224
TotB	1.37174	3R:16699671-16700259	9.31089	24.095	FBgn0038838
CG10924	1.3713	2R:14414936-14423263	1.524	3.94265	FBgn0034356
CG7916	1.3693	2L:13835566-13898715	69.6842	180.026	FBgn0028534
CG14235	1.36911	X:19634574-19638371	1248.18	3224.19	FBgn0031066
CecB	1.36364	3R:26039055-26039519	2.21482	5.69945	FBgn0000278
Amyrel	1.36364	2R:12538596-12540204	3.84163	9.88578	FBgn0020506
CG13051	1.36364	3L:16257913-16258165	1.06074	2.72963	FBgn0040799
snoRNA:Me18S-C1831	1.36364	2L:4457175-4458364	192.213	494.627	FBgn0065053
CG17637	-1.35827	3L:20490411-20507212	40.2808	15.7115	FBgn0037004
CG9676	-1.35717	X:16590164-16605178	49.7341	19.4135	FBgn0030773
CG14866	1.35319	3R:11142194-11145768	0.394107	1.00685	FBgn0038315
alpha4GT2	-1.3504	3R:21657296-21668287	9.46421	3.71169	FBgn0039378
otu	-1.34897	X:8379025-8410015	0.867954	0.340735	FBgn0003023
CG30415	1.34832	2R:19273200-19273969	1043.8	2657.67	FBgn0250838
TwdlP	-1.34824	3R:22446329-22447082	4.42513	1.73806	FBgn0039435
CG14191	-1.3478	X:18975699-18976606	8.11829	3.18961	FBgn0030981
CG6310	1.34656	3L:11062142-11062953	9.15226	23.2747	FBgn0036121
CG3640	-1.3465	2R:20527210-20529760	63.2306	24.8651	FBgn0035042
CG17108	-1.34598	2L:10692939-10694103	602.05	236.838	FBgn0032285
Pglym78	1.34485	3R:24973969-24977512	412.995	1049.02	FBgn0014869
CG8012	1.34413	3L:8208530-8209302	66.0197	167.609	FBgn0040832
plu	1.33716	2R:16150462-16151224	1.04883	2.64992	FBgn0003114
GstD6	1.33716	3R:8202893-8203629	0.44063	1.11327	FBgn0010042
RFeSP	1.33711	2L:1612685-1614182	667.299	1685.89	FBgn0021906
sphinx1	-1.33599	3L:7431520-7432505	16.0054	6.34005	FBgn0052383
CG15766	1.33449	X:5708896-5709853	0.849029	2.14113	FBgn0029813
CG13833	-1.33003	3R:18859005-18861285	35.2897	14.0369	FBgn0039040
CG10157	1.32869	3R:19504612-19505604	66.4223	166.836	FBgn0039099
ATPsyn-b	1.32726	3L:9723076-9724324	817.221	2050.61	FBgn0019644
CG5966	1.32337	X:5882844-5886677	14.7879	37.0066	FBgn0029831
CG16976	-1.32086	3L:2665286-2667542	1.38983	0.556341	FBgn0035366
CG8997	1.31965	2L:13835566-13898715	148.797	371.406	FBgn0028920
ox	1.31857	2R:8640530-8645028	1821.64	4543.5	FBgn0011227
CG15646	-1.31819	X:15562094-15563327	1.59468	0.639527	FBgn0030665
CG1368	1.31584	X:14068793-14069703	33.5688	83.5687	FBgn0030539
Obp56d	-1.31582	2R:15590634-15591300	356.893	143.363	FBgn0034470
CG1746	1.31208	3R:27041863-27045357	2074.44	5150.84	FBgn0039830
CG12836	-1.31193	2R:2955751-2957322	0.829344	0.334044	FBgn0033140
CG6839	1.31186	3L:18910680-18913402	5.2755	13.097	FBgn0036831
kl-3	-1.31112	YHet:34289-65839	0.778639	0.313799	FBgn0001314
CG34172	1.30934	2L:2192524-2193010	799.028	1980.22	FBgn0085201
CG11037	-1.30931	3L:20953497-20954486	209.319	84.4631	FBgn0037038
Kr	-1.3092	2R:21114137-21117057	0.800408	0.323	FBgn0001325
CG33493	1.30872	3L:10685914-10686235	161.932	401.14	FBgn0053493
CG10956	-1.3085	2R:13010397-13011742	12.451	5.02695	FBgn0034195
thetaTry	1.30787	2R:7229218-7230261	30.6833	75.9645	FBgn0011555
Gr94a	-1.30618	3R:18875378-18879804	0.885322	0.358014	FBgn0041225
CG14673	1.30474	3R:1452215-1453049	1.20247	2.97057	FBgn0037352
CG14515	1.30474	3R:25023304-25024933	0.783467	1.93547	FBgn0039648
CG16836	1.30422	2R:14276599-14276963	531.092	1311.54	FBgn0040735
CG5958	1.30401	2L:7430528-7433480	72.7299	179.58	FBgn0031913
CG14634	1.30297	X:702249-778497	6.94451	17.1347	FBgn0040892
MtnC	-1.29933	3R:16186067-16186258	3442.7	1398.82	FBgn0038790
CG13847	-1.29933	3R:18250935-18261490	0.810786	0.329435	FBgn0038967
CG42633	-1.29933	3R:6606686-6607989	0.878315	0.356872	FBgn0261356
CG9965	-1.29869	3L:2954762-2957533	6.22254	2.52943	FBgn0035381
CG13144	1.29745	2L:10488744-10491429	5.69963	14.0093	FBgn0032260
CG34253	1.29692	3L:18079490-18080416	23.7885	58.449	FBgn0085282
Cht3	-1.29511	2L:22892289-22918647	1.05197	0.428686	FBgn0250907
CG9722	1.28854	3R:9978606-9979551	29.9384	73.1337	FBgn0038209
TotC	1.2884	3R:16698709-16699310	43.1946	105.506	FBgn0044812
CG13313	-1.28692	3L:8951475-8953995	2.09869	0.8601	FBgn0035941
CG14034	-1.28651	2L:5215210-5216533	112.494	46.116	FBgn0250847
CG13700	-1.28388	3L:18291840-18294360	54.4419	22.3587	FBgn0036785
Gpdh	1.28132	2L:5943681-5949092	441.512	1073.14	FBgn0001128
GstD2	-1.27882	3R:8197692-8198426	51.6678	21.294	FBgn0010038
CG34046	1.27875	3R:27534986-27535336	1.80883	4.38873	FBgn0054046
Obp18a	1.276	X:19029112-19029901	24.9224	60.3537	FBgn0030985
CG31559	-1.27515	3R:1975837-1982949	0.844818	0.349064	FBgn0051559
rpr	1.27496	3L:18390652-18391503	3.4255	8.28943	FBgn0011706
ATPsyn-Cf6	1.27476	3R:19180972-19181782	1251.65	3028.49	FBgn0016119
CG16926	1.27424	2R:15385258-15388801	559.125	1352.36	FBgn0040732
CG34345	-1.27333	2L:6623122-6632404	2.8478	1.17814	FBgn0085374
CG11841	-1.27187	3R:24876792-24878047	72.2467	29.9189	FBgn0039628
CG15221	-1.26642	X:11618372-11630650	2.01852	0.839079	FBgn0030331
CG32055	-1.26642	3L:10211603-10213264	0.790979	0.328803	FBgn0052055
Jon25Bii	1.26505	2L:4952249-4953134	13.5499	32.5653	FBgn0031654
CG6974	-1.26481	3R:10904251-10905007	9.88313	4.11292	FBgn0038285
CG42681	1.2641	2L:14744434-14744817	1.50329	3.61057	FBgn0261567
CG40948	-1.26315	U:8664362-8664965	3.36478	1.40188	FBgn0085541
CG6289	-1.26282	3L:20335805-20337279	424.496	176.899	FBgn0036970
Dro	1.26262	2R:10633460-10633821	18.8043	45.1171	FBgn0010388
CG42564	-1.26255	3R:2200196-2203070	56.5668	23.5775	FBgn0260766
CG2249	1.26155	2R:5936984-5939682	1179.99	2829.08	FBgn0040773
CG9034	1.26144	X:9053540-9054018	333.239	798.892	FBgn0040931
CG34342	-1.26097	3L:5496627-5503920	0.807239	0.336831	FBgn0085371
CG31148	1.26048	3R:19526359-19528324	7.43751	17.8185	FBgn0051148
CG31524	-1.25925	3R:26338043-26340077	16.8203	7.02689	FBgn0051524
CG15212	1.25894	3L:5124649-5125229	5.37223	12.8568	FBgn0040842
CG1304	1.25857	X:20835547-20836443	15.521	37.1353	FBgn0031141
CG13026	1.25756	3L:16718609-16719269	25.5723	61.1413	FBgn0036656
CG9525	-1.25418	2L:8960317-8962354	1.75556	0.735984	FBgn0032080
l(2)06225	1.25397	2L:10975534-10987416	491.308	1171.75	FBgn0010612
Ppr-Y	-1.25304	YHet:156741-206246	5.01429	2.10382	FBgn0046697
CG10587	-1.25198	3L:20954636-20955655	23.7213	9.95992	FBgn0037039
CG9080	-1.2508	2R:7129249-7129700	69.1061	29.0393	FBgn0033593
CG12688	-1.2478	X:4275504-4277202	1.14881	0.483753	FBgn0029707
CG11041	-1.2478	2R:16033637-16034329	1.47429	0.620807	FBgn0034481
CG18585	1.24497	2L:7647034-7691057	9.24701	21.9167	FBgn0031929
CG15067	1.24398	2R:14272416-14273093	650.771	1541.36	FBgn0034331
CG9806	-1.2437	X:10517757-10521145	1.84013	0.777067	FBgn0030222
CG12203	1.24033	X:19386455-19388434	224.043	529.307	FBgn0031021
CG3588	-1.24022	X:2813802-2818416	1.91666	0.811335	FBgn0025643
Ugt86Dd	-1.24003	3R:6952315-6954035	34.3463	14.541	FBgn0040256
CG7953	1.23854	2L:13835566-13898715	73.3926	173.177	FBgn0028533
CG10185	-1.2354	3R:11886408-11893234	1.31833	0.559928	FBgn0038397
CG30486	-1.23525	2R:8735538-8736481	24.4041	10.3661	FBgn0050486
CG7580	1.23488	3L:17467860-17469224	1010.09	2377.38	FBgn0036728
CG31296	1.23352	3R:11356238-11357195	7.27027	17.0954	FBgn0051296
CG18594	1.23216	3R:18291757-18292401	349.199	820.335	FBgn0038973
CG33339	-1.23131	3R:20187568-20188788	1.41096	0.60097	FBgn0053339
CG5768	-1.22748	3R:20211824-20216089	1.54092	0.658069	FBgn0039198
CG6012	1.22706	2L:16860072-16861419	3.65493	8.55582	FBgn0032615
CG12896	1.22613	2R:6314384-6315418	1.0954	2.56257	FBgn0033521
CG31016	-1.22512	3R:26431910-26436178	3.49547	1.49523	FBgn0051016
Or59b	-1.21768	2R:19351815-19379520	3.39083	1.45797	FBgn0034865
CG8795	-1.21732	3R:9154786-9159885	0.705937	0.30361	FBgn0038139
Ald	1.21691	3R:22080403-22087313	792.873	1843.02	FBgn0000064
CR32657	1.21665	X:11981243-11981728	993.966	2310.04	FBgn0052657
Npc2a	1.21417	2L:1988290-1988949	221.3	513.434	FBgn0031381
CG14482	1.2132	2R:13459836-13460259	1570.9	3642.17	FBgn0034245
CG18404	1.21199	3R:26078903-26079820	71.0519	164.597	FBgn0039761
CG11501	1.21163	3R:25319573-25319987	0.405849	0.939945	FBgn0039666
CG1342	1.21163	3R:26516365-26518490	0.418772	0.969874	FBgn0039795
CG14374	1.21163	3R:9222530-9222830	0.85368	1.97712	FBgn0040553
CG13230	1.21163	2R:7042432-7042731	1.11318	2.57812	FBgn0040764
CG13713	1.21163	3L:4692783-4796249	0.42684	0.988559	FBgn0042199
CR12628	1.21163	2L:22226150-22226771	0.306623	0.710138	FBgn0042701
snoRNA:Psi28S-2149	1.21163	3R:26032239-26034742	5.14171	11.9082	FBgn0086664
Sfp33A4	-1.21002	2L:11814825-11928570	2223.48	961.127	FBgn0261056
CG33966	1.2096	3L:1234137-1235233	6.61076	15.2889	FBgn0053966
CG32199	-1.20821	3L:18593247-18611031	25.4096	10.9974	FBgn0052199
CG6908	1.20709	3R:7514098-7515745	24.2672	56.026	FBgn0037936
CG18537	-1.20521	2R:14166569-14244766	5.22482	2.26604	FBgn0034323
CG34206	1.20444	2R:18024493-18062243	6.86445	15.8189	FBgn0085235
CR34031	-1.20341	3L:23178236-23178791	2.42676	1.05382	FBgn0054031
CG17298	-1.20324	3R:17102385-17119720	354.069	153.772	FBgn0038879
CG41056	-1.20222	3RHet:1130827-1310687	1.39388	0.605789	FBgn0058232
asparagine-synthetase	1.20012	3L:21165952-21176378	16.9955	39.0489	FBgn0041607
CG9168	-1.19955	3L:1342489-1424979	13.8474	6.02928	FBgn0035216
l(2)35Di	1.19923	2L:15749608-15751054	267.272	613.704	FBgn0001989
Sfp70A4	-1.19721	3L:13289755-13289960	612.411	267.083	FBgn0259970
CG9640	1.19568	2R:12932460-12934273	11.1878	25.626	FBgn0034182
lectin-21Ca	-1.19551	2L:624643-625453	20.6424	9.01314	FBgn0040107
CG1126	-1.19436	3R:642055-643498	1.1205	0.489638	FBgn0037280
CG42513	-1.19197	3L:16412893-16516025	0.910213	0.398404	FBgn0260387
Obp83cd	1.18881	3R:1933855-1936740	32.4704	74.021	FBgn0046878
MEP-1	-1.18778	3L:2631719-2641984	10.1174	4.44134	FBgn0035357
CG15803	-1.18777	3R:14178555-14181249	0.893428	0.392196	FBgn0038606
BG642378	-1.18727	3L:19121627-19122765	121.424	53.3213	FBgn0052203
CG6934	-1.1857	3R:10937310-10957645	4.30396	1.89207	FBgn0038289
Pepck	1.18436	2R:14424271-14426924	308.566	701.253	FBgn0003067
CG12859	1.18288	2R:10644025-10645334	381.44	865.984	FBgn0033961
sxe2	-1.18251	3R:11894244-11923310	24.3552	10.7305	FBgn0038398
CG3348	1.18132	3R:23114492-23117911	30.6787	69.5746	FBgn0040609
HLHmgamma	-1.18069	3R:21825579-21826421	0.701445	0.309437	FBgn0002735
snoRNA:U14:30Eb	-1.18069	2L:9893804-9895003	228.125	100.635	FBgn0063391
snoRNA:Psi28S-3091a	-1.18069	3R:1421085-1426891	46.3894	20.4643	FBgn0082979
CG11699	1.18034	X:11464656-11466475	79.9016	181.081	FBgn0030311
Sfp77F	-1.18014	3L:20890141-20890498	567.484	250.435	FBgn0259972
CG10029	-1.17846	3R:3141445-3142929	41.0993	18.1586	FBgn0037498
GstE1	1.17565	2R:14285894-14286729	27.4234	61.9481	FBgn0034335
CG7542	1.17532	3L:17542925-17543758	33.1686	74.9089	FBgn0036738
CG17752	-1.17459	3R:15435946-15438159	36.6456	16.2343	FBgn0038718
NP15.6	1.17412	3R:14850836-14854558	391.092	882.52	FBgn0027785
CG5078	-1.17402	3L:20490411-20507212	4.03783	1.7895	FBgn0037005
CG30395	-1.17399	2R:17653029-17657701	87.1153	38.6089	FBgn0050395
stv	1.17394	3L:13470652-13476621	57.3434	129.382	FBgn0086708
Gapdh1	1.17381	2R:3679402-3693904	993.177	2240.67	FBgn0001091
PH4alphaNE1	-1.17084	3R:26322472-26325944	1.08866	0.483541	FBgn0039780
CG10513	-1.17078	3R:21101510-21102934	141.869	63.0156	FBgn0039311
CG11550	-1.17024	3R:27503948-27505602	18.894	8.39549	FBgn0039864
CG10651	-1.16886	2L:20133842-20134901	20.7971	9.24999	FBgn0032853
CG42255	1.16759	3L:11795184-11807855	0.509975	1.14559	FBgn0259140
unc79	-1.16714	3R:15055214-15071852	6.42226	2.85986	FBgn0038693
CG14410	-1.16688	X:14730757-14731363	11.0262	4.9109	FBgn0030583
Or59c	-1.16474	2R:19351815-19379520	2.78774	1.24345	FBgn0034866
CG10664	1.16326	2L:19958706-19960004	1283.43	2874.42	FBgn0032833
CG11391	-1.15883	3R:15604487-15606438	5.33789	2.39072	FBgn0038732
BG642312	-1.15804	3L:6225564-6226481	2135.78	957.086	FBgn0047334
Cpr49Ab	1.15772	2R:8265961-8266901	254.106	566.919	FBgn0050042
CG17734	1.15343	3R:7067921-7069698	203.725	453.172	FBgn0037890
CG3683	1.15214	2R:20551920-20553543	308.008	684.528	FBgn0035046
CG34192	-1.15094	2R:13343268-13343666	3.75583	1.69137	FBgn0085221
Rab9E	1.15023	X:10523347-10603712	0.874268	1.94043	FBgn0052673
CG34248	1.1475	3L:16263469-16263898	2.1783	4.82558	FBgn0085277
CG15864	-1.14743	3R:4074159-4076046	14.0001	6.32008	FBgn0040528
CG30488	-1.14517	2R:8734352-8735509	59.3124	26.8173	FBgn0050488
CG34384	-1.14488	3R:3640940-3679622	3.18745	1.44146	FBgn0085413
CG7054	-1.14484	3R:18290634-18291660	62.3357	28.1907	FBgn0038972
CG12531	-1.14471	X:19613575-19620775	0.849689	0.384299	FBgn0031064
CG32817	1.14469	X:373478-375842	1.85424	4.09969	FBgn0052817
CG13068	1.14407	3L:16262490-16262934	6.38165	14.1037	FBgn0036588
CG10592	1.14346	3L:5585840-5588372	5.37943	11.8837	FBgn0035619
lectin-37Db	1.14303	2L:19400780-19430270	155.748	343.961	FBgn0053533
PGRP-SC1b	-1.14151	2R:4600948-4601587	5.33984	2.42046	FBgn0033327
CG34214	1.14124	2R:20551920-20553543	0.450668	0.994043	FBgn0085243
CR41590	1.14124	U:7398711-7400705	0.416692	0.919102	FBgn0085807
CG3560	1.14067	X:16179985-16182554	1200.58	2647.07	FBgn0030733
Lsp1beta	1.13927	2L:898646-901320	37.6622	82.9584	FBgn0002563
CG14107	-1.13887	3L:13372391-13374443	7.56853	3.437	FBgn0036351
nompB	-1.13876	2L:21578318-21589355	8.08757	3.67297	FBgn0016919
CG3999	1.13827	3R:6077239-6081002	5.86493	12.9097	FBgn0037801
DptB	1.13773	2R:14754894-14755400	21.3965	47.0798	FBgn0034407
Tsp5D	1.13734	X:5961992-5968890	11.6771	25.6866	FBgn0029837
CG10219	1.13722	3R:19584062-19586318	317.945	699.343	FBgn0039112
CG3214	1.13675	2L:2579216-2580056	497.155	1093.17	FBgn0031436
Obp83ef	1.13644	3R:1933855-1936740	23.9288	52.6046	FBgn0046876
CG12400	1.13589	2L:3145124-3145719	501.488	1102.04	FBgn0031505
dro4	-1.13175	3L:3315636-3315945	614.875	280.605	FBgn0052282
PH4alphaNE2	-1.13141	3R:26333866-26337936	35.9502	16.4102	FBgn0039783
CG10713	-1.13076	3L:13422530-13428329	1.74116	0.795145	FBgn0036360
CG14963	-1.13031	3L:3169286-3172545	17.7101	8.09029	FBgn0035409
Cyp6d4	1.1302	3R:18524046-18526029	10.5913	23.1831	FBgn0039006
CG31636	1.12965	2L:6656669-6657738	5.05333	11.057	FBgn0051636
CG32284	-1.1294	3L:3186663-3187245	25.6056	11.7044	FBgn0052284
CG15253	1.12917	2L:15615518-15616333	0.45829	1.00243	FBgn0028948
CG7402	-1.12711	3L:17880804-17884504	6.16627	2.82311	FBgn0036768
CG31496	-1.12642	3R:3170790-3172076	23.2198	10.6359	FBgn0051496
CG11752	1.12586	X:11244031-11244527	200.183	436.861	FBgn0030292
ppk19	1.12585	3R:25498177-25501141	2.86384	6.24974	FBgn0039679
CG1537	1.12548	X:10956053-10957118	5.01852	10.9491	FBgn0030260
CG4476	-1.12507	3L:9204983-9208369	2.21324	1.01472	FBgn0035969
CG14369	1.12417	3R:9417997-9418336	18.6227	40.593	FBgn0038159
PGRP-SC1a	-1.1241	2R:4597267-4597825	10.5347	4.83319	FBgn0043576
CG30470	1.12325	2R:11297676-11358613	0.816488	1.77861	FBgn0050470
ATPsyn-gamma	1.12291	3R:25573423-25574858	654.35	1425.08	FBgn0020235
CG14061	-1.12231	3R:24582720-24583956	153.532	70.5261	FBgn0039598
elk	-1.12135	2R:13761451-13813097	1.38754	0.637801	FBgn0011589
CG11608	-1.12007	3R:8464202-8465669	16.1954	7.45102	FBgn0038069
Cyp6a15Psi	-1.11988	2R:4456873-4457652	6.98019	3.21181	FBgn0033303
CG4763	1.11766	2R:19707892-19724863	0.94885	2.05895	FBgn0034910
CG32698	1.11715	X:9682514-9743263	2.24687	4.87385	FBgn0052698
Mst84Db	1.11701	3R:3190879-3191349	1700.32	3687.95	FBgn0004173
CG32155	1.117	3L:16227239-16230099	6.19148	13.429	FBgn0052155
l(3)neo18	1.11656	3L:12129873-12131684	423.327	917.897	FBgn0011455
CG15431	-1.1148	2L:4406128-4409353	0.792584	0.365981	FBgn0031602
CG33228	1.11453	2R:20555933-20556853	17.8586	38.6683	FBgn0261373
sesB	1.1121	X:10666576-10680978	1466.44	3169.87	FBgn0003360
Rab9D	1.1121	X:10483214-10483808	0.546417	1.18113	FBgn0067052
snoRNA:Me28S-A982b	1.1121	2R:4982802-4985972	215.196	465.166	FBgn0082942
snoRNA:Me28S-A2634c	1.1121	3L:1665142-1668677	119.509	258.33	FBgn0082944
glob1	1.11176	3R:11722647-11728226	278.386	601.616	FBgn0027657
Jon99Ci	1.11159	3R:25750947-25751907	49.7552	107.513	FBgn0003358
CG6403	-1.1103	3R:22561275-22562018	1.07357	0.497275	FBgn0039453
CG31041	-1.1103	3R:25415789-25416616	5.70032	2.64038	FBgn0051041
CG33777	-1.1103	3L:4554536-4555236	2.70605	1.25344	FBgn0053777
CG34207	-1.1103	2R:18205166-18217225	2.02453	0.937759	FBgn0085236
CG14527	1.10766	3R:24696333-24748494	0.538712	1.16091	FBgn0039613
Gal	1.10541	2L:6000230-6006791	24.3885	52.4743	FBgn0001089
CG3790	1.10399	2R:8760288-8762518	0.622125	1.33725	FBgn0033778
CG8628	1.1038	3L:7123973-7124605	211.034	453.555	FBgn0250836
pncr016:2R	1.10175	2R:14598895-14599457	7.10336	15.2449	FBgn0062961
nimC2	1.10149	2L:13980145-14001252	2.63444	5.6529	FBgn0028939
Acp70A	-1.10148	3L:13294734-13295022	3105.02	1447.06	FBgn0003034
CG2983	-1.10103	2L:2847631-2848997	7.99877	3.72889	FBgn0031472
CG7568	-1.09915	3R:25417543-25442879	0.803829	0.37522	FBgn0039673
Acp65Aa	1.09829	3L:6145149-6145845	529.543	1133.75	FBgn0020765
Oscp	1.0982	3R:11091297-11092412	896.414	1919.11	FBgn0016691
CG14406	1.09642	X:14733410-14827616	13.9922	29.9185	FBgn0030595
CG42262	1.09615	X:9762218-9765597	10.6549	22.7785	FBgn0259147
CG5162	-1.09592	X:17109334-17111249	303.579	142.026	FBgn0030828
CG33325	-1.09471	3R:4502638-4506052	12.0609	5.64727	FBgn0053325
Ir93a	-1.09471	3R:16677427-16685667	0.952017	0.445763	FBgn0259215
CG16749	1.09377	3R:5156606-5157617	44.4101	94.7852	FBgn0037678
CG4098	-1.09322	3L:16596186-16602320	4.35017	2.03898	FBgn0036648
CG5948	-1.09322	3R:21721601-21722816	3.91918	1.83697	FBgn0039386
CG4769	1.09248	3L:5353289-5355898	316.508	674.921	FBgn0035600
CG31337	1.09233	3R:9369693-9371106	0.718333	1.53162	FBgn0051337
Npc2f	1.09175	3R:19963616-19966658	21.3943	45.5982	FBgn0039154
CG6793	-1.0915	3L:12001314-12057959	1.4579	0.684152	FBgn0036242
CG15773	1.09062	X:5613767-5632072	0.501226	1.06744	FBgn0029795
CG11370	1.09062	3L:22705256-22706763	0.551796	1.17513	FBgn0037181
Acp63F	-1.09052	3L:3814184-3818383	1940.43	911.212	FBgn0015585
CG31418	-1.0904	3R:13109516-13110237	98.9267	46.4592	FBgn0051418
Smvt	-1.09003	3R:27585237-27587299	58.065	27.2761	FBgn0039873
snmRNA:158	-1.08758	2L:5206204-5206361	580.733	273.265	FBgn0065104
CG17279	-1.08605	3R:16875735-16876637	4.35059	2.04934	FBgn0038850
CG7328	1.08496	3L:20122281-20133605	4.47214	9.48683	FBgn0036942
mRpL42	1.08257	2R:5954153-5956199	58.8077	124.543	FBgn0033480
CG10073	1.0807	2R:15269120-15272470	0.609837	1.28984	FBgn0034440
fd96Cb	1.07918	3R:20920830-20921655	0.652013	1.3776	FBgn0004898
CR42532	1.07918	2R:7754447-7755084	1.32751	2.80482	FBgn0260437
CG8745	1.07899	3L:13839153-13859985	16.246	34.3204	FBgn0036381
zpg	-1.07735	3L:6597236-6601860	1.60267	0.759506	FBgn0024177
Fer2	-1.07735	3R:11975290-11977064	2.2374	1.0603	FBgn0038402
CG12105	1.07655	3L:1602953-1617355	4.28909	9.04561	FBgn0035241
CG18682	1.07615	3R:25947744-25950457	6.5252	13.7577	FBgn0040625
CG32983	1.07578	2L:8865849-8866659	14.3477	30.2429	FBgn0052983
PH4alphaNE3	-1.07546	3R:26429902-26431866	32.0635	15.2148	FBgn0051017
CG18672	-1.07489	3R:27086393-27087368	13.615	6.46314	FBgn0040628
CG34163	1.07377	2L:11988284-11989861	21.9681	46.2413	FBgn0085192
CG8680	1.07163	2L:5099499-5100214	448.422	942.499	FBgn0031684
CG7906	1.07077	3L:14229823-14231372	1.74213	3.65944	FBgn0036417
cype	1.06878	2L:5327240-5328870	1217.48	2553.86	FBgn0015031
GC	-1.06748	3L:1618391-1629298	2.57868	1.23042	FBgn0035245
CG3290	-1.0669	2R:18093509-18095492	25.086	11.9746	FBgn0034711
scpr-B	1.06655	3R:7063536-7066713	137.379	287.729	FBgn0037888
Nplp2	1.0662	3L:13349632-13350328	5985.15	12532.3	FBgn0040813
CG10357	-1.06449	3L:3615381-3616682	3.64185	1.74132	FBgn0035453
CG42397	1.064	3L:11966184-11966890	145.406	304.004	FBgn0259748
CG6834	-1.06319	3R:7510390-7513852	9.17751	4.3921	FBgn0037935
toe	-1.06304	3L:12415607-12425768	9.4144	4.50595	FBgn0036285
CG3598	1.06277	X:2831160-2832106	0.488249	1.01992	FBgn0025645
CG34136	1.06146	2L:21094960-21102392	66.9878	139.806	FBgn0083972
Ir94e	-1.06139	3R:19231230-19233124	0.75737	0.36291	FBgn0259194
trn	-1.0611	3L:13107372-13111188	3.81176	1.82684	FBgn0010452
IM3	1.05882	2R:14275624-14275995	3344.5	6967.36	FBgn0040736
CG34242	1.05879	3L:12527095-12527503	56.1704	117.014	FBgn0085271
CG13622	-1.05783	3R:20348311-20349154	1.50074	0.720889	FBgn0039202
Jhe	1.05759	2R:12007310-12010278	9.52156	19.8187	FBgn0010052
tey	-1.05692	3L:19643901-19656763	3.32092	1.59622	FBgn0036899
CG7798	-1.05614	2R:12109685-12110132	5.34939	2.57261	FBgn0034092
CG10361	1.05531	3L:11792043-11793956	10.5511	21.9269	FBgn0036208
CG9184	-1.05451	3L:1318481-1329623	2.58058	1.24245	FBgn0035208
mRpS10	1.0528	3R:11055377-11057408	40.7281	84.4925	FBgn0038307
CG14483	1.05255	2R:13473139-13473659	189.903	393.896	FBgn0034248
CG31883	-1.05231	2L:9521213-9540060	261.869	126.272	FBgn0032122
CG42460	-1.0514	2L:3387897-3388496	1.02391	0.494036	FBgn0259950
CG32397	-1.04982	3L:6543838-6596466	3.44225	1.6627	FBgn0052397
CG30480	1.0485	2R:10559439-10601126	0.409379	0.846749	FBgn0050480
CG18540	-1.04849	2R:14166569-14244766	20.2856	9.80754	FBgn0034326
CG8083	1.04808	2R:4966231-4969879	4.12624	8.53212	FBgn0025709
CG7712	1.0477	2R:6782015-6785388	318.368	658.141	FBgn0033570
CG4363	1.04745	2R:17721734-17722534	178.228	368.374	FBgn0034663
CG32150	-1.04741	3L:15830863-15837158	2.41758	1.16971	FBgn0052150
CG31313	1.0473	3R:10392301-10393148	565.098	1167.87	FBgn0051313
CG13155	1.04685	2R:8267118-8267931	54.5034	112.605	FBgn0033723
CG5703	1.04676	X:17526121-17527539	203.856	421.143	FBgn0030853
Art4	-1.04651	3R:5700402-5814598	6.05462	2.93126	FBgn0037770
CG11828	-1.04455	3R:24748765-24796076	30.7095	14.8878	FBgn0039616
Spn2	-1.04429	2L:8240413-8242135	532.674	258.285	FBgn0028987
NLaz	1.0442	2L:1359982-1361732	156.138	321.991	FBgn0053126
ATPsyn-beta	1.04385	4:1052439-1055175	1412.22	2911.59	FBgn0010217
CG3192	1.04212	X:6571293-6577729	206.393	425.016	FBgn0029888
CG32413	-1.04212	3L:5895985-5897155	6.6395	3.22422	FBgn0052413
CG12239	-1.04187	X:5686179-5688581	27.9923	13.5958	FBgn0029810
CG9350	1.0418	2R:16912584-16913591	337.261	694.35	FBgn0034576
lectin-21Cb	-1.04171	2L:620432-621540	6.65486	3.23261	FBgn0040106
CG13479	1.04171	3L:14560880-14561230	0.435506	0.89656	FBgn0040811
snoRNA:Psi28S-3327a	1.04171	3L:13034855-13037012	8.61088	17.7269	FBgn0082967
Cyp6a8	-1.04135	2R:10774672-10776514	5.78996	2.81318	FBgn0013772
pb	-1.04123	3R:2533517-2567785	1.33305	0.647746	FBgn0051481
CG34375	-1.03937	3R:18825860-18836284	11.0647	5.38338	FBgn0085404
CR32660	1.03802	X:11814029-11814811	248.281	509.822	FBgn0052660
Spn3	-1.03672	2L:20836607-20838179	611.021	297.832	FBgn0028986
CG15130	-1.0363	2L:20423184-20424599	1.92778	0.939945	FBgn0032860
CG2641	-1.0356	3R:3619930-3622321	6.3055	3.07591	FBgn0037518
IM2	1.03532	2R:14274101-14274535	995.554	2040.45	FBgn0025583
CG41128	1.03506	3RHet:1806527-1808475	515.677	1056.72	FBgn0069923
Cyp6a16Psi	-1.03384	2L:5621601-5623760	1.57619	0.769824	FBgn0031726
CG40053	-1.03326	3L:24003030-24004463	4.3653	2.13291	FBgn0058053
Acp26Ab	-1.03281	2L:5892297-5892862	540.007	263.933	FBgn0002856
GlyP	1.03172	2L:2130814-2137296	175.623	359.054	FBgn0004507
CG31269	1.03064	3R:12952847-12953923	6.65775	13.6013	FBgn0051269
CG14615	-1.02968	X:21849579-21851327	10.7574	5.26918	FBgn0031184
Tsp42Eb	1.02877	2R:2880180-2891766	0.905457	1.84739	FBgn0042086
CG32985	-1.02824	2L:8962616-8964628	18.4728	9.05736	FBgn0052985
CG16732	-1.02756	3R:19360794-19362407	3.01746	1.48018	FBgn0039086
mus81	-1.02733	X:835089-839805	1.15808	0.568173	FBgn0040347
CG17018	-1.02684	2L:22311930-22368776	2.79475	1.37162	FBgn0039972
CG31089	1.02628	3R:21728418-21729812	0.94313	1.92093	FBgn0051089
CG31413	-1.02602	3R:19528482-19530265	13.5369	6.64745	FBgn0051413
CG33757	-1.02541	2R:5333550-5365595	1.40788	0.691651	FBgn0053757
CG17186	-1.02496	3R:15701691-15703160	8.21684	4.03794	FBgn0038741
CG32407	1.0243	3L:5915154-5916667	39.3876	80.1134	FBgn0052407
CG11455	1.02362	2L:155332-157666	618.075	1256.55	FBgn0031228
wus	-1.02339	X:16832529-16834859	2.69356	1.32512	FBgn0030805
CG30438	-1.02299	2R:1384183-1437059	90.4097	44.4903	FBgn0050438
CG9306	1.02264	2L:13369192-13371083	408.844	830.619	FBgn0032511
CG42481	-1.0224	3L:13291894-13292122	8120.66	3997.79	FBgn0259971
DnaJ-1	1.0219	3L:5743121-5745330	177.425	360.277	FBgn0015657
CG15784	-1.02174	X:5324712-5326494	71.2521	35.0932	FBgn0029766
CG31021	-1.0214	3R:26427927-26429763	29.6734	14.6182	FBgn0051021
CG11584	-1.02103	X:14075062-14077348	1.00614	0.495789	FBgn0030541
GstD7	1.02095	3R:8204260-8204977	7.26965	14.752	FBgn0010043
CG32633	1.02095	X:13455706-13457392	12.6932	25.7577	FBgn0052633
CG13049	-1.02033	3L:16274228-16275092	1.78906	0.882009	FBgn0036592
OdsH	-1.01932	X:17685082-17708021	3.52398	1.73855	FBgn0026058
CG8401	-1.01905	2R:11916107-11917596	2.43479	1.20143	FBgn0034069
CG6277	1.01795	3R:22847790-22848934	33.8107	68.468	FBgn0039475
Aph-4	-1.0174	3R:26874653-26878268	98.5535	48.686	FBgn0016123
mtacp1	1.01661	3L:1329805-1331633	452.142	914.756	FBgn0011361
CG14210	1.01651	X:19510239-19512562	21.8551	44.2133	FBgn0031040
spheroide	1.01642	X:16590164-16605178	15.8758	32.115	FBgn0030774
CG13071	1.01608	3L:16254852-16256220	8.33623	16.8593	FBgn0036585
SdhC	1.01583	3R:7034855-7035571	522.315	1056.16	FBgn0037873
Ugt36Ba	1.01571	2L:16794235-16795807	1.30856	2.64577	FBgn0040262
CG7998	1.0145	3R:14052112-14054440	564.997	1141.41	FBgn0038587
CG9897	1.01295	2R:18873052-18873851	8.99776	18.1577	FBgn0034807
CG10586	-1.01293	3L:20948854-20949850	65.0302	32.225	FBgn0037036
CG42659	1.01287	2L:18007334-18007843	508.086	1025.28	FBgn0261531
dpr14	-1.01076	X:7799664-7801814	1.65063	0.819182	FBgn0029974
CG11864	-1.00813	2L:15612489-15613335	33.0331	16.4238	FBgn0028944
CG12868	1.00757	2R:10492051-10492840	33.9178	68.1927	FBgn0033945
Mst57Db	-1.0061	3R:21656443-21657014	3685.97	1835.21	FBgn0011669
CG3446	1.00592	X:6243355-6244432	291.151	584.694	FBgn0029868
sphinx2	-1.00591	3L:7432798-7433833	25.5396	12.7176	FBgn0052382
Dbi	1.00531	3L:7124964-7126563	1570.75	3153.07	FBgn0010387
Jhedup	-1.00422	2R:12004615-12006654	15.7771	7.86554	FBgn0034076
CG18519	-1.00384	3R:11363564-11368113	1.25694	0.626801	FBgn0038348
CG32551	-1.00368	X:18329747-18334614	24.9416	12.439	FBgn0052551
Cyp4e3	1.00236	2L:9747838-9750071	20.4057	40.878	FBgn0015035
Cpr92F	1.0013	3R:16495292-16498538	203.067	406.499	FBgn0038819
CG15034	1.00073	X:7241009-7241527	233.868	467.973	FBgn0029946
CG13950	-1.00052	2L:860320-861696	8.90082	4.4488	FBgn0031289
CG14245	1.00029	3R:22553263-22555772	144.966	289.99	FBgn0039452
CG13293	-1.00011	3L:6080368-6083134	1.32955	0.664724	FBgn0035677
gt	-0.999516	X:2321139-2322996	0.958852	0.479587	FBgn0001150
CG33137	0.998638	2R:9062698-9063580	0.862561	1.72349	FBgn0053137
Gr64c	-0.997821	3L:4030431-4031925	0.741766	0.371443	FBgn0045477
Gcn2	-0.99619	3R:27221379-27283499	3.11867	1.56346	FBgn0019990
Gr28b	-0.996025	2L:7454824-7462247	1.24005	0.621736	FBgn0045495
CG15220	0.995057	X:11509260-11509873	17.3382	34.5577	FBgn0030322
CG14518	-0.994819	3R:24850692-24851881	2.02473	1.01601	FBgn0039621
CG5500	0.994249	3R:22702354-22706893	54.2897	108.147	FBgn0039461
kdn	0.993633	X:6244661-6255226	257.602	512.934	FBgn0086133
Ser6	0.993452	X:20833629-20834528	20.9733	41.7566	FBgn0011834
Mst84Dd	0.99202	3R:3189016-3189495	819.977	1630.91	FBgn0004175
CR34285	-0.991243	3R:15194716-15228870	8.70394	4.37847	FBgn0085314
CG34130	-0.990969	3R:22014788-22015682	67.5762	34.0003	FBgn0083966
CG15917	0.990668	2R:13023961-13024410	146.386	290.884	FBgn0034199
CG34424	0.987278	2R:19245182-19253777	33.8338	67.0735	FBgn0085453
Cpr49Aa	0.987259	2R:8264174-8264883	5.13727	10.1842	FBgn0050045
CG1701	-0.98516	2R:3296397-3296865	86.17	43.5305	FBgn0033167
CG14195	-0.984056	X:19102853-19105391	4.40242	2.22567	FBgn0030998
CG13609	-0.984056	3R:20023309-20054260	3.10926	1.57191	FBgn0039170
Ccp84Aa	0.981935	3R:2529803-2530625	5.82916	11.5132	FBgn0004783
blw	0.98183	2R:18686558-18689691	683.349	1349.59	FBgn0011211
Elo68beta	0.98147	3L:11093772-11096123	0.542658	1.07147	FBgn0036128
Cp18	-0.981013	3L:8719890-8720713	3.06486	1.55273	FBgn0000357
Fhos	0.979702	3L:8747242-8791819	19.596	38.6444	FBgn0261259
CG11321	0.979039	2L:6760526-6770949	14.7505	29.0754	FBgn0031857
CG34051	-0.978882	2L:19960068-19961030	236.069	119.775	FBgn0054051
CG15068	0.978417	2R:14277846-14278114	4074.59	8028.17	FBgn0040733
CG15831	0.978142	3RHet:242408-419079	0.630623	1.24228	FBgn0040034
CG10700	-0.977402	2L:19077375-19078995	3.4314	1.74279	FBgn0032754
CG42261	-0.977402	3R:21798293-21807019	1.69108	0.858888	FBgn0259146
CG34360	-0.975226	3R:5700402-5814598	14.8581	7.55775	FBgn0250818
CG34400	-0.975191	3L:13865828-13895161	0.900065	0.457838	FBgn0085429
Cpr49Af	0.974593	2R:8293509-8293948	1.32271	2.59925	FBgn0033729
Pdsw	0.974575	2L:3466161-3467326	442.48	869.5	FBgn0021967
Cyp49a1	-0.973884	2R:6325465-6351297	14.721	7.49494	FBgn0033524
lectin-28C	0.972717	2L:7857089-7857931	55.0801	108.097	FBgn0040099
CG34040	0.971261	2R:17720005-17721012	55.8967	109.588	FBgn0054040
CG12521	0.97053	3L:11840434-11840903	149.089	292.149	FBgn0040816
CG10516	0.970506	3L:15961262-15962910	81.1752	159.065	FBgn0036549
CG13325	0.970392	2R:9003809-9013285	4.41373	8.64814	FBgn0033792
CG14419	-0.970341	X:2779213-2779944	19.4503	9.92718	FBgn0029639
CG42682	-0.970303	2L:14842127-14843101	33.7679	17.2351	FBgn0261568
Shaw	-0.970265	2L:3718186-3727587	5.39922	2.75583	FBgn0003386
CG12879	-0.969939	3R:23519869-23522173	15.7887	8.06057	FBgn0039540
CG6555	-0.968491	2L:11591337-11591678	1818.29	929.219	FBgn0032367
CG15330	0.968138	X:7850096-7850735	17.2442	33.7351	FBgn0029987
CG6912	-0.967652	3R:10960859-10962702	38.4482	19.66	FBgn0038290
Cyp6w1	-0.967354	2R:2061200-2062947	179.397	91.7514	FBgn0033065
Arc1	-0.966943	2R:10245427-10247799	34.5319	17.6661	FBgn0033926
CG13502	-0.96486	2R:17967675-17976084	0.928989	0.475947	FBgn0034692
lectin-29Ca	-0.962453	2L:8393488-8394280	239.127	122.716	FBgn0040098
Gycbeta100B	-0.961333	3R:26960113-26997242	3.71747	1.90923	FBgn0013973
CG34355	-0.961222	3R:19646335-19675071	3.55062	1.82367	FBgn0085384
CG4650	0.961089	2L:14773809-14774981	1.2831	2.49791	FBgn0032549
CG8834	0.960938	2R:8307315-8309988	33.7199	65.6383	FBgn0033733
Acon	0.960172	2L:21168355-21173017	291.523	567.171	FBgn0010100
CG9619	0.96003	3L:19274463-19281669	7.96496	15.4946	FBgn0036862
CG17959	-0.958293	X:2841137-2841584	1.57851	0.812404	FBgn0029647
Obp8a	-0.958293	X:9108928-9109735	7.48126	3.85035	FBgn0030103
CG18539	-0.958293	2R:14166569-14244766	2.69752	1.38832	FBgn0034325
CG8629	-0.958293	3L:7121012-7121360	3.97205	2.04428	FBgn0035742
CG14324	-0.958293	3R:13444000-13444513	2.01353	1.0363	FBgn0038527
Obp50d	-0.958293	2R:10260628-10261264	2.41247	1.24161	FBgn0050074
CG32797	-0.958293	X:2319129-2319738	1.57854	0.812421	FBgn0052797
snmRNA:641	-0.958293	3L:17661687-17661830	23.775	12.2362	FBgn0065088
snoRNA:Me28S-G3255b	-0.958293	2R:4982802-4985972	91.6115	47.1493	FBgn0082927
snoRNA:Me28S-G2703a	-0.958293	2R:10509110-10512013	217.333	111.854	FBgn0082931
snoRNA:Me18S-G642	-0.958293	2L:11210680-11269179	120.094	61.808	FBgn0086035
snoRNA:Me18S-C1096	-0.958293	3R:7045989-7050897	76.0732	39.1523	FBgn0086055
snoRNA:Me28S-G2017	-0.958293	3R:7045989-7050897	48.9933	25.2152	FBgn0086057
CG42583	-0.958293	X:20033885-20034203	1.09943	0.565837	FBgn0260873
CheA86a	-0.958293	3R:6970230-6970864	1.04804	0.539392	FBgn0261291
CG5235	0.957875	3L:16080726-16083487	0.528087	1.02578	FBgn0036565
CG34296	0.957875	3R:25548263-25548735	3.11573	6.05214	FBgn0085325
CG12419	-0.957748	3R:5700402-5814598	0.99839	0.514031	FBgn0037769
CG6639	0.957519	2L:17452923-17458775	14.4703	28.1008	FBgn0032638
Muc11A	-0.957273	X:11953833-11959180	86.8272	44.7186	FBgn0052656
CG10031	0.957143	2L:3698450-3699091	75.216	146.029	FBgn0031563
GstE4	-0.956428	2R:14290779-14291591	27.0938	13.9623	FBgn0063496
CG5644	-0.956164	3L:8968147-8972980	9.56725	4.93121	FBgn0035948
bip1	-0.955541	3L:8047432-8051811	6.62034	3.41376	FBgn0026263
CG34283	0.955091	3R:14531173-14558068	43.9414	85.1893	FBgn0085312
CG4653	0.954061	X:16590164-16605178	28.0341	54.311	FBgn0030776
CG14627	0.953834	X:1076134-1076947	1.9246	3.72797	FBgn0040361
CG15908	0.952898	2R:2555654-2557581	17.1505	33.1992	FBgn0033085
CG10962	0.95276	X:8801100-8947352	14.6098	28.2783	FBgn0030073
CG18233	-0.951145	3L:18593247-18611031	27.5037	14.2255	FBgn0036795
CG31777	0.950209	2L:3706542-3707060	62.1407	120.065	FBgn0051777
CG30369	0.949161	2R:4146835-4147288	131.539	253.969	FBgn0050369
CG13641	0.949121	3R:20688653-20690502	24.3106	46.9365	FBgn0039239
dro6	0.948598	3L:3336143-3336362	2.22636	4.29687	FBgn0052268
snoRNA:Psi28S-1232	0.948598	X:6635569-6638290	11.165	21.5485	FBgn0082997
DNApol-alpha60	0.948598	3L:20352932-20354673	0.942833	1.81966	FBgn0259676
retinin	0.947876	3L:16325018-16325889	266.347	513.791	FBgn0040074
CG10663	-0.947656	3L:12468106-12474814	2.12796	1.10329	FBgn0036287
CG3604	-0.947272	2L:3697241-3697872	32.5394	16.8754	FBgn0031562
CG13005	-0.947066	X:16697712-16699313	2.06807	1.07268	FBgn0030794
CG14608	-0.947066	3R:3057373-3066409	0.852969	0.442423	FBgn0037487
CG32115	0.946889	3L:12905126-12906746	2.65599	5.11998	FBgn0052115
CG11768	-0.945694	3R:4573527-4593922	3.00177	1.55846	FBgn0037625
Cyp4s3	0.945099	X:14987285-15010572	23.1098	44.4938	FBgn0030615
lectin-46Ca	-0.944935	2R:5698889-5707556	91.5342	47.5477	FBgn0040093
CG32040	-0.9436	3L:9342710-9352031	1.80044	0.936109	FBgn0052040
beat-VII	-0.943186	3R:22474352-22507688	0.783185	0.407321	FBgn0250908
Spn7	-0.943076	2L:7581931-7583334	50.3895	26.2087	FBgn0083141
CG18301	-0.942198	2L:10531851-10533576	39.2398	20.4219	FBgn0032265
CG31680	-0.94002	2L:20640145-20640718	185.14	96.4998	FBgn0051680
CG13086	0.939196	2L:19364393-19365397	63.2818	121.34	FBgn0032770
slbo	0.939054	2R:20219044-20221829	0.751372	1.44058	FBgn0005638
CG17242	-0.938838	2L:2268298-2269119	445.207	232.244	FBgn0250841
CG18234	-0.938482	3L:18593247-18611031	38.2226	19.9439	FBgn0036794
CG7447	-0.938423	3L:4384454-4403186	62.319	32.5182	FBgn0035539
CG11663	0.937303	X:785379-802854	123.815	237.098	FBgn0029539
Ugt86De	-0.937231	3R:6992019-6993699	1.02775	0.536728	FBgn0040255
CG15579	0.93701	X:4205396-4205832	57.4078	109.91	FBgn0040906
CG17472	-0.935012	2L:20634556-20635163	469.53	245.582	FBgn0032868
CG32695	0.934792	X:9767571-9768022	109.354	209.042	FBgn0052695
CG9396	0.934525	3R:5396132-5397345	119.827	229.02	FBgn0037714
CG13889	-0.933684	3L:844267-851080	5.04305	2.64014	FBgn0035168
UK114	0.932448	2L:15274229-15275060	286.576	546.933	FBgn0086691
CG42251	-0.932249	X:12413011-12425266	1.11362	0.583584	FBgn0259109
gprs	-0.932204	2R:12528744-12536284	1.48053	0.77588	FBgn0024232
awd	0.93199	3R:27570008-27571706	759.491	1449.04	FBgn0000150
sala	0.931524	2L:11486188-11486955	0.734842	1.40156	FBgn0003313
CG17570	0.931524	2L:20263894-20264299	1.80183	3.43662	FBgn0260000
CG8860	0.931196	2R:8066987-8067392	199.791	380.974	FBgn0033691
CG15695	-0.930409	3R:16667863-16670709	12.5517	6.586	FBgn0038832
CG12828	-0.929496	2R:3036792-3037142	167.731	88.0656	FBgn0033145
GstD3	-0.929293	3R:8198789-8199535	30.9828	16.2695	FBgn0010039
Acp98AB	-0.928739	3R:23519869-23522173	3742.01	1965.74	FBgn0013745
CG13947	-0.928447	2L:779203-779563	162.81	85.544	FBgn0031277
CG15553	-0.928392	3R:26924589-26926891	5.15236	2.70728	FBgn0039817
CG4576	-0.928298	3R:11629973-11658354	2.27647	1.19624	FBgn0038366
CG33138	0.927164	2R:9058905-9062305	78.4545	149.184	FBgn0053138
CG32833	-0.926232	2R:18870854-18872837	26.9347	14.1739	FBgn0052833
CG4362	0.92623	3R:16132034-16133242	1.08429	2.06048	FBgn0038784
CG13954	-0.925872	2R:5257634-5261741	0.930236	0.489641	FBgn0033405
CG3106	0.925488	X:9553128-9556789	6.95437	13.2086	FBgn0030148
CG34393	-0.925235	2L:3175111-3199620	2.41044	1.26933	FBgn0085422
GstE8	0.925037	2R:14295338-14296067	24.5578	46.6287	FBgn0063492
CG2022	0.924878	3R:812221-836753	87.6238	166.356	FBgn0037292
CG10320	0.924792	2R:17545579-17547508	726.404	1379.01	FBgn0034645
Mcm10	-0.924023	2L:21179940-21198745	3.39928	1.79155	FBgn0032929
CG42394	0.92378	3R:6675682-6680144	15.6088	29.6111	FBgn0259740
CG31526	0.923366	3R:319125-383789	19.9895	37.9107	FBgn0051526
slmo	0.922729	2L:6046645-6050474	185.206	351.095	FBgn0029161
l(3)03670	0.922316	3R:26878332-26879634	153.881	291.629	FBgn0010808
CG33007	-0.922224	2R:9030336-9040161	1.80639	0.953224	FBgn0053007
Gpo-1	0.921714	2R:11745255-11750251	153.03	289.894	FBgn0022160
Sfp65A	-0.921492	3L:6343375-6343929	351.131	185.384	FBgn0259969
asp	-0.920172	3R:20579624-20586235	3.01087	1.59108	FBgn0000140
CG32368	-0.920031	3L:7908535-7908954	195.441	103.29	FBgn0052368
CG9672	0.919837	X:16590164-16605178	40.3315	76.3032	FBgn0030777
Obp99d	0.919688	3R:25540260-25540674	37.8455	71.5925	FBgn0039684
Tsp42Ek	0.91912	2R:2930425-2932118	11.9098	22.521	FBgn0033133
CG9363	0.917886	3R:5283368-5286362	12.5338	23.6807	FBgn0037697
CG13463	-0.917404	3L:15007794-15058077	17.384	9.20413	FBgn0036470
CG15213	0.917119	3L:5125997-5126245	387.392	731.529	FBgn0040843
lambdaTry	0.916787	2R:7224352-7225296	30.9004	58.337	FBgn0043470
Cpr64Ad	0.916176	3L:4215386-4216414	0.768207	1.44969	FBgn0035513
CR33283	0.916176	3L:20971864-20972750	0.718331	1.35557	FBgn0053283
CG12111	0.915748	X:8464284-8464968	63.1074	119.055	FBgn0030050
CG4726	-0.915622	2L:1143202-1147395	6.23076	3.30302	FBgn0031307
CG5621	-0.914989	3R:16727715-16733987	6.97974	3.70169	FBgn0038840
CG6271	-0.913899	3R:22850682-22851822	3.14985	1.67178	FBgn0039476
CG1999	0.913652	X:7252828-7254101	177.898	335.125	FBgn0029947
CG34129	-0.913315	3R:22015977-22016924	57.966	30.7779	FBgn0083965
CG14535	-0.91175	2L:7846817-7853301	0.814514	0.432947	FBgn0031955
CG30430	0.911563	2R:20973302-21027064	1037.88	1952.33	FBgn0050430
CG34220	-0.911293	2R:5923267-5936123	275.449	146.459	FBgn0085249
Cyp6a2	-0.911142	2R:2649416-2684421	52.435	27.8831	FBgn0000473
Ir100a	-0.910987	3R:27619810-27630878	2.38554	1.26868	FBgn0039879
Def	0.910807	2R:5940047-5954060	16.0577	30.19	FBgn0010385
Adgf-C	-0.910704	3R:9532478-9534854	9.10149	4.84132	FBgn0038173
CG2663	-0.910431	3R:1226315-1229851	58.1238	30.9234	FBgn0037323
mRpS18C	0.909842	3R:26249733-26250211	56.5316	106.214	FBgn0039765
Drl-2	-0.909383	2R:8944080-8967043	0.688982	0.366823	FBgn0033791
CG6499	-0.909383	3R:11072968-11074859	1.24851	0.664723	FBgn0038309
CG14593	-0.907657	2R:1938476-1956185	1.55584	0.829342	FBgn0033058
CG34439	0.907125	2R:9040392-9051348	513.121	962.258	FBgn0085468
Lcp65Ac	0.906777	3L:6137923-6138493	1.00791	1.88968	FBgn0020642
CG8420	-0.906341	3R:5073172-5077160	65.3855	34.8856	FBgn0037664
CG8563	-0.903845	3L:7384178-7389116	0.700039	0.374143	FBgn0035777
CG10345	-0.902456	3R:12422794-12430510	22.8997	12.2508	FBgn0027562
CG34423	0.902365	2R:19245182-19253777	17.2756	32.2903	FBgn0085452
CG15116	-0.901237	2R:14942735-14943429	131.763	70.5497	FBgn0034415
CG14671	0.901109	3R:1389843-1390537	26.3245	49.1611	FBgn0037340
CG31437	0.900844	3R:21173089-21298778	1.54268	2.88043	FBgn0051437
CG5968	0.900457	2L:16545032-16662012	336.216	627.6	FBgn0032588
CG42467	-0.90031	2L:3701306-3701604	116.332	62.3275	FBgn0259957
CheA87a	-0.900025	3R:9195390-9197626	23.4464	12.5644	FBgn0038142
LvpD	0.899919	2R:4341136-4343291	15.0142	28.0159	FBgn0002569
CG14569	0.899688	3L:21723823-21724647	0.824924	1.53903	FBgn0037123
CG6640	-0.899687	3L:10088846-10093981	67.6099	36.2391	FBgn0036068
robo3	-0.899399	2L:1256825-1293835	1.51957	0.814657	FBgn0041097
PH4alphaSG1	-0.899158	3R:26329384-26331371	3.40916	1.82799	FBgn0051014
CG4288	-0.898712	3R:16333111-16338169	40.387	21.6622	FBgn0038799
Muc68D	-0.897256	3L:11760398-11765244	39.1498	21.0198	FBgn0036203
CG34383	0.89557	3R:9540944-9588535	3.80243	7.07383	FBgn0085412
CG9452	-0.895498	3L:19494244-19496961	8.44913	4.54193	FBgn0036877
CheA75a	-0.895332	3L:18245187-18245946	64.6632	34.7644	FBgn0036783
CG13792	-0.89434	2L:7643526-7645997	3.55181	1.91085	FBgn0031927
l(2)03659	-0.893804	2R:5277962-5282705	0.951138	0.511896	FBgn0010549
CR40190	0.893456	2RHet:338743-339377	4.68674	8.70619	FBgn0085732
CG40002	0.892759	3LHet:459585-460458	39.6709	73.6579	FBgn0058002
CG14443	-0.892705	X:6494097-6546131	0.823326	0.443446	FBgn0029880
CG34386	0.89226	2R:13950208-13981138	1.18393	2.19748	FBgn0085415
CG14913	-0.891888	2L:11013220-11066997	1.03532	0.557942	FBgn0032331
Teh1	-0.891179	3R:5653579-5693842	1.57457	0.848968	FBgn0037766
CG31321	-0.891179	3R:10136088-10140134	8.10005	4.36733	FBgn0051321
CG11106	0.89071	X:11096301-11096840	288.864	535.579	FBgn0030280
CG30286	0.889736	2R:17410509-17446932	1.21772	2.25624	FBgn0050286
CG16995	0.889704	2L:2308026-2308671	2.24787	4.16485	FBgn0031412
TwdlBeta	0.889704	2R:7750041-7750753	1.04874	1.94311	FBgn0033658
TotX	0.889704	3R:16727715-16733987	6.9432	12.8643	FBgn0044810
CR41540	0.888706	U:8839004-8840283	19.1103	35.383	FBgn0085797
CG11876	0.888552	3R:24938792-24941918	299.654	554.754	FBgn0039635
CG9997	-0.887304	3R:24581671-24582701	106.398	57.5215	FBgn0039597
ppk	-0.88674	2L:14378217-14381170	1.672	0.904274	FBgn0020258
CG31515	-0.885834	3R:19214146-19214593	69.8051	37.7768	FBgn0051515
CG14529	-0.885412	3R:24696333-24748494	3.63497	1.96773	FBgn0039609
Gyc88E	-0.883887	3R:11009907-11021932	1.19724	0.648792	FBgn0038295
CG10621	0.883224	2L:18952205-18954425	103.783	191.426	FBgn0032726
CG5261	0.88272	2L:7426865-7430329	206.661	381.052	FBgn0031912
CG4169	0.882683	3L:16577223-16580199	303.111	558.876	FBgn0250814
Sfp35C	-0.882442	2L:15201612-15202092	439.443	238.375	FBgn0259965
CG9519	-0.882343	X:14733410-14827616	14.6497	7.94728	FBgn0030589
CG14820	-0.88188	3L:6926029-6927939	4.11744	2.23437	FBgn0035718
dj-1beta	0.88176	3R:26632847-26633701	67.04	123.529	FBgn0039802
CG31206	0.88046	3R:15932657-15933723	177.844	327.404	FBgn0051206
Oat	0.880041	3L:19640375-19642949	37.6835	69.3537	FBgn0022774
CG4250	0.879868	2R:18551192-18551979	170.892	314.477	FBgn0034761
CG17556	0.879205	3R:12818755-12821810	34.089	62.7021	FBgn0038462
CG31740	0.878837	2L:18007934-18011475	1579.78	2905.04	FBgn0051740
Hsp70Ba	-0.878566	3R:8291025-8293500	0.825784	0.449151	FBgn0013277
unc-13-4A	-0.878325	3L:7261248-7278137	0.837851	0.45579	FBgn0035756
CG30157	0.878251	2R:2859616-2862638	8.87645	16.3162	FBgn0050157
CG6168	-0.877835	3L:11313790-11314819	80.6189	43.8714	FBgn0036154
CG31778	0.877724	2L:3703658-3705462	33.6225	61.7805	FBgn0051778
arg	0.877366	X:403450-424324	13.7069	25.1798	FBgn0023535
CG5028	0.877289	3R:21506539-21509363	170.264	312.762	FBgn0039358
CG34228	0.877245	2R:7539381-7539844	73.4846	134.981	FBgn0085257
CG11664	-0.877043	X:702249-778497	15.0807	8.21117	FBgn0040341
CG9673	0.876945	X:16590164-16605178	57.7946	106.139	FBgn0030775
janB	0.8768	3R:25863701-25865259	657.599	1207.55	FBgn0001281
CG3105	-0.876705	2R:19876239-19879573	1.9522	1.06319	FBgn0034950
CG4259	0.876327	2L:2128214-2129211	17.8997	32.8585	FBgn0031389
CG34388	-0.875675	3R:10217401-10307410	1.62342	0.884765	FBgn0085417
nimB5	0.874638	2L:13970528-13972947	15.1484	27.7754	FBgn0028936
snoRNA:Psi18S-1275	0.874597	3R:5603766-5604800	91.8494	168.405	FBgn0086663
Or1a	-0.874532	X:173735-364670	0.99554	0.542998	FBgn0029521
CG9399	0.8734	3R:5397632-5399927	235.001	430.515	FBgn0037715
CG32050	0.872953	3L:9809169-9827447	7.38052	13.5167	FBgn0052050
CG5322	0.872785	2L:10452709-10455822	5.06023	9.26626	FBgn0032253
CG15760	-0.872563	X:13563731-13568511	1.48399	0.810517	FBgn0030508
CG42654	-0.871357	3L:19932385-19971065	16.1059	8.804	FBgn0261506
CG31870	0.871105	2L:10772037-10801107	897.744	1642.03	FBgn0051870
CG10659	0.871008	2L:20025112-20025781	32.0343	58.5889	FBgn0032839
CG7329	-0.870752	2L:10629351-10631053	16.8471	9.21306	FBgn0032271
Acp76A	-0.869783	3L:19043890-19045126	387.178	211.875	FBgn0015586
Est-P	-0.869756	3L:12183832-12186787	1.09606	0.599809	FBgn0000594
CG8690	0.869093	2R:4357053-4361448	64.6077	118.007	FBgn0033297
CG11617	0.86851	2L:203783-207297	8.01909	14.6411	FBgn0031232
Tsp42Er	0.8683	2R:2951920-2953618	24.2335	44.2386	FBgn0033139
CG32298	0.867801	3L:2388391-2408341	44.3719	80.9733	FBgn0052298
Eig71Eb	0.867678	3L:15643060-15643641	2.89393	5.28062	FBgn0004589
CG8446	0.86754	2R:12083890-12086886	489.831	893.72	FBgn0034089
ETH	0.867394	2R:20682177-20682981	15.3734	28.0467	FBgn0028738
CG11378	0.867193	X:1065461-1066775	73.6969	134.431	FBgn0040364
CG34241	0.866497	3L:12121123-12121559	409.2	746.065	FBgn0250825
mRpL27	0.866479	2L:4459003-4459532	74.1271	135.149	FBgn0053002
Rh2	-0.866409	3R:14725142-14726741	25.6352	14.0612	FBgn0003248
CG2052	-0.865673	4:396259-414016	5.69596	3.12589	FBgn0039905
CG5791	-0.865583	3R:17911092-17935903	362.902	199.17	FBgn0040582
CG32039	0.865137	3L:9352081-9353096	18.7926	34.231	FBgn0052039
CG5267	-0.865044	2R:12639000-12660002	26.443	14.518	FBgn0034154
Task6	-0.864866	3R:9494312-9497823	5.91617	3.24855	FBgn0038165
CR40621	0.864632	U:9411517-9412651	61.8468	112.615	FBgn0085757
CG32564	-0.864078	X:17100440-17101887	2.79457	1.53533	FBgn0052564
CG34033	-0.863943	2R:5708067-5710539	141.107	77.5309	FBgn0054033
CG34462	0.863709	3L:8321779-8323216	3.24733	5.9092	FBgn0085491
tow	-0.863679	3L:6936055-6941770	2.77671	1.52594	FBgn0035719
Sas	-0.863656	3R:8252299-8255002	1.27003	0.697956	FBgn0038045
CG17567	0.863568	2L:19183090-19183613	2137.97	3890.11	FBgn0040994
CG4271	-0.863552	2L:2285173-2286873	25.7356	14.1442	FBgn0031409
CG9555	0.863504	2L:8991988-8993632	4.45018	8.09688	FBgn0032085
CG13428	-0.862606	2R:16427015-16427953	349.744	192.344	FBgn0034515
CG33109	-0.862238	3R:10046272-10047301	90.0472	49.5348	FBgn0053109
CG3713	0.862118	X:702249-778497	14.4253	26.221	FBgn0040343
CG8501	0.861546	2R:8271124-8272025	16.0823	29.2213	FBgn0033724
CG18643	0.861135	3R:7255782-7257397	4.5284	8.22569	FBgn0037898
Ada1-1	0.861135	2L:11996810-11999317	0.41075	0.746114	FBgn0051865
CG34219	0.860791	2R:4802032-4810256	4.47973	8.13534	FBgn0085248
CG15198	0.860745	X:11142441-11142810	357.71	649.592	FBgn0030283
CG15863	0.860467	2R:5846623-5852567	8.86909	16.103	FBgn0033467
Lsp1gamma	0.86016	3L:66438-69003	2.06055	3.74038	FBgn0002564
Adhr	0.860091	2L:14599775-14689325	23.3337	42.3542	FBgn0000056
Trf4-1	0.859541	X:8454667-8461653	8.43479	15.3046	FBgn0030049
daw	-0.859239	2L:2805517-2812147	6.57687	3.62545	FBgn0031461
CG13737	0.858996	3L:13865828-13895161	4.56801	8.28535	FBgn0036382
CG42507	-0.858966	3L:14741028-14754944	9.00625	4.96557	FBgn0260233
CG13002	-0.858757	X:16783842-16784670	0.685851	0.378197	FBgn0030804
CG12644	-0.858757	X:10052842-10053124	3.5451	1.95487	FBgn0040940
CG9170	-0.858613	X:15872233-15876974	6.73952	3.71673	FBgn0030716
Mst35Bb	0.85745	2L:14882100-14883715	378.498	685.775	FBgn0013301
CG15765	-0.857178	X:5712596-5734846	8.05861	4.4486	FBgn0029814
neuroligin	-0.855979	2L:6896829-6906661	3.86287	2.1342	FBgn0031866
ORMDL	0.854751	3L:21628404-21629351	42.6208	77.0775	FBgn0037110
CG5302	-0.854221	3R:11458604-11464977	3.17661	1.75719	FBgn0038351
Nc	-0.85417	3L:9961542-9964102	36.2296	20.0416	FBgn0026404
Teh3	-0.853323	3L:4173852-4193788	1.97632	1.09391	FBgn0040697
l(1)G0334	0.853316	X:4596304-4599156	225.557	407.503	FBgn0028325
CG42346	-0.8528	X:22268487-22286070	0.882378	0.488581	FBgn0259677
CG12947	-0.852794	3R:5605785-5608779	10.9366	6.05569	FBgn0037753
Cpr49Ag	0.852229	2R:8295340-8296038	6.70785	12.1096	FBgn0033730
Sox15	-0.851984	2R:10088887-10099914	1.0501	0.58178	FBgn0005613
CG34324	-0.850887	X:13339938-13413663	906.003	502.327	FBgn0085353
CG32727	0.850391	X:7301242-7301768	50.2364	90.5756	FBgn0052727
CG13856	0.849677	3R:18228376-18230783	19.2687	34.7241	FBgn0038959
CG7294	0.849062	2L:10688726-10689269	0.377171	0.67941	FBgn0032284
CG13674	0.849062	3L:8211538-8212083	0.463261	0.834485	FBgn0035858
CG14626	0.849062	X:1078814-1082623	0.422693	0.761409	FBgn0040360
CG33469	0.849062	2R:10493156-10493774	2.77961	5.00699	FBgn0053469
snoRNA:Psi28S-2442b	0.849062	3R:1421085-1426891	15.4251	27.7857	FBgn0082988
snoRNA:Psi28S-3436b	0.849062	X:6635569-6638290	15.85	28.551	FBgn0086602
CG42649	0.849062	2R:13480318-13491489	0.484317	0.872414	FBgn0261501
Gld	-0.848681	3R:3077770-3091423	21.3424	11.8513	FBgn0001112
Dpy-30L2	0.848612	3L:4046610-4059665	525.991	947.187	FBgn0035491
CG9485	0.848346	2R:17200184-17207522	6.19061	11.1458	FBgn0034618
lmd	-0.848239	3R:18846943-18852435	1.16772	0.648624	FBgn0039039
nimB3	0.847546	2L:13967463-13967966	23.853	42.922	FBgn0054003
CG9500	-0.847262	2L:6357250-6358235	1.73256	0.963026	FBgn0031804
CG7991	-0.847262	3L:1712138-1714894	0.673542	0.374381	FBgn0035260
CG13058	-0.847262	3L:16321938-16322634	1.31871	0.732988	FBgn0036610
CG4186	0.847245	3L:20761306-20763180	53.108	95.5446	FBgn0040634
CG6415	0.846968	2L:10702234-10706190	15.9174	28.6309	FBgn0032287
CG12558	-0.846648	3R:24616243-24617183	37.7858	21.0118	FBgn0039599
CG8157	0.845701	2R:11213337-11213888	68.3851	122.898	FBgn0034010
CG30035	0.845646	2R:7540260-7566857	95.2619	171.192	FBgn0050035
CG15535	0.843592	3R:26248751-26249554	12.1659	21.8319	FBgn0039764
Rgl	-0.843239	3L:13899990-13918348	8.42716	4.69722	FBgn0026376
CG14512	0.8429	3R:24956771-24964295	8.89705	15.9582	FBgn0039639
nAcRalpha-96Aa	-0.841479	3R:20226947-20282651	1.08349	0.604667	FBgn0000036
CG34175	0.841455	2L:3398022-3398684	45.5056	81.5395	FBgn0085204
CG9903	0.841408	X:16433377-16434814	1.4868	2.66404	FBgn0030756
CG12079	0.841351	3L:3158489-3159573	267.557	479.39	FBgn0035404
CG8708	-0.840801	2R:4046961-4048735	47.0401	26.264	FBgn0033271
CG33281	0.840503	2L:3324233-3326637	65.401	117.112	FBgn0053281
kek2	-0.839796	2L:11621818-11626136	1.33129	0.743819	FBgn0015400
CG3011	0.839667	X:5802157-5810826	73.4035	131.366	FBgn0029823
CG34117	0.839573	3R:5225291-5225771	90.7567	162.411	FBgn0083953
SP1029	-0.839329	3R:25070679-25076167	11.7537	6.56917	FBgn0040282
NepYr	-0.838994	3R:22853639-22889500	1.60107	0.895052	FBgn0004842
l(3)70Da	0.838344	3L:14064991-14075985	5.59961	10.0121	FBgn0013563
CG11236	0.837557	2L:6803032-6804372	28.4961	50.9231	FBgn0031860
CheB42a	-0.837269	2R:2813206-2859139	5.48181	3.06818	FBgn0053348
CG5804	0.836613	3L:8747242-8791819	733.371	1309.69	FBgn0035926
CG14551	0.836123	3R:21885217-21888733	2.22132	3.9656	FBgn0039408
CG5612	-0.836061	3R:23433985-23461782	50.2056	28.1237	FBgn0039529
Nrt	-0.835371	3L:16759173-16772815	2.31518	1.29752	FBgn0004108
CG31105	-0.834758	3R:20683343-20685456	30.7272	17.228	FBgn0051105
lectin-37Da	-0.833977	2L:19400780-19430270	96.0666	53.8915	FBgn0053532
CG15219	0.833725	2L:22104879-22105506	1504.75	2681.88	FBgn0040519
CG33346	0.833181	3R:24494954-24496174	37.7237	67.209	FBgn0053346
CG14455	-0.832762	3L:22679457-22680201	1.48051	0.831239	FBgn0037175
CG33800	-0.832762	2R:5636304-5636894	0.710338	0.398822	FBgn0053800
CheB42b	-0.832757	2R:2813206-2859139	13.9315	7.82193	FBgn0066293
CG13759	-0.832491	X:2475064-2479732	54.0732	30.3653	FBgn0040376
nAcRalpha-96Ab	-0.832453	3R:20311163-20316875	7.51546	4.22048	FBgn0000039
CG32432	-0.832194	3L:20835100-20878288	6.30883	3.54351	FBgn0052432
CG1545	0.831241	X:10951577-10953652	10.6345	18.921	FBgn0030259
CG9918	-0.831142	3R:9926179-9928562	6.77379	3.80744	FBgn0038201
thr	-0.830587	2R:13748303-13753397	2.59406	1.45864	FBgn0003701
CG14982	-0.830376	3L:3942849-3946457	2.06477	1.16119	FBgn0035477
CG18180	-0.830037	3L:9624933-9672203	332.924	187.275	FBgn0036024
CG9518	-0.829956	X:14733410-14827616	0.792709	0.445936	FBgn0030590
tko	0.82961	X:2336345-2338009	35.6566	63.3691	FBgn0003714
CG15210	0.829299	X:10726784-10741125	76.716	136.311	FBgn0040850
ND23	0.828745	3R:11661769-11662819	315.396	560.187	FBgn0017567
CG34299	-0.828559	3R:26075314-26076282	82.5319	46.473	FBgn0085328
CG34112	0.828303	3R:219466-219768	15.849	28.1414	FBgn0086608
CG9460	-0.828232	2R:2773909-2775767	3.09444	1.74284	FBgn0033115
mex1	0.82739	3L:15510556-15511556	33.9648	60.2696	FBgn0004228
SdhB	0.827119	2R:2695115-2697234	245.311	435.216	FBgn0014028
etaTry	0.826968	2R:7228017-7228928	9.91681	17.592	FBgn0011554
CG18107	0.82604	2R:14272069-14272416	187.77	332.881	FBgn0034330
CG6045	-0.825876	3R:11368473-11373457	24.5016	13.8223	FBgn0038349
CG10362	-0.825502	X:11820442-11824883	2.65049	1.49564	FBgn0030358
Sfp38D	-0.825248	2L:20640916-20641622	37.4398	21.1304	FBgn0261058
Dsk	-0.825127	3R:15387-16170	15.6056	8.80833	FBgn0000500
Orct2	-0.825026	3R:20098752-20101013	4.81748	2.71933	FBgn0086365
CG8138	0.824934	3R:9006397-9007825	41.4903	73.4981	FBgn0038122
mRpL54	0.824546	2R:16948328-16949096	27.8894	49.3915	FBgn0034579
AlkB	0.823971	X:15752166-15753520	4.76768	8.4401	FBgn0065035
CG34139	-0.823763	3R:16030530-16071195	1.81309	1.02433	FBgn0083975
CG15040	-0.823544	X:18500734-18506606	3.33421	1.884	FBgn0030940
CG13995	-0.823302	2L:6054306-6060169	2.81008	1.58811	FBgn0031770
beat-IV	-0.822461	3R:19383133-19405268	2.55113	1.4426	FBgn0039089
CG15279	-0.822265	2L:14844992-14851749	34.065	19.2656	FBgn0028886
RpL29	0.821587	2R:17181274-17183092	2453.22	4335.69	FBgn0016726
CG6220	-0.821094	2R:9510592-9636882	8.12826	4.6007	FBgn0033865
CG31205	-0.820942	3R:16557352-16558326	77.2024	43.7021	FBgn0051205
CG14977	0.820877	3L:3896899-3899156	58.0215	102.494	FBgn0035469
RpS19a	0.820841	X:16531911-16532953	1262.39	2229.93	FBgn0010412
CG18536	-0.820679	2R:14166569-14244766	8.88557	5.03079	FBgn0034322
Fmrf	-0.820567	2R:5793795-5797969	10.1801	5.76416	FBgn0000715
RpS29	0.820561	3R:5603766-5604800	1901.78	3358.73	FBgn0037752
CG9497	-0.820486	2L:6346541-6348151	31.1188	17.621	FBgn0031800
CG31902	-0.820365	2L:7887692-7889129	18.5319	10.4946	FBgn0051902
CG13705	0.819315	3L:4896857-4898470	0.78044	1.37714	FBgn0035582
Acp32CD	-0.818502	2L:11013220-11066997	232.55	131.863	FBgn0023415
CG9172	0.818376	X:15879876-15880791	247.102	435.745	FBgn0030718
eloF	0.818151	3R:5639882-5640881	13.5746	23.9339	FBgn0037762
Obp56i	-0.81743	2R:15755620-15756101	45.5366	25.8398	FBgn0043532
CG4377	0.817281	2R:17722952-17723835	152.77	269.193	FBgn0034664
CG18208	0.817001	3R:14631872-14674946	0.609106	1.07309	FBgn0038653
CG11093	-0.816553	4:982966-999048	1.11396	0.632502	FBgn0039932
otp	-0.816466	2R:16771115-16790900	1.8471	1.04884	FBgn0015524
CecC	0.816147	3R:26042205-26042659	6.70422	11.8041	FBgn0000279
Obp56f	-0.816047	2R:15600918-15601481	208.35	118.342	FBgn0043533
CG31909	0.815914	2L:7255459-7277168	238.486	419.834	FBgn0051909
CG32174	0.815759	3L:17420394-17426689	12.3901	21.8094	FBgn0052174
CG34170	0.815011	2L:17311506-17311820	214.448	377.281	FBgn0085199
Edg91	-0.814934	3R:13436577-13437233	2.08322	1.18417	FBgn0004554
CG10339	-0.813903	2R:19965856-19967999	3.27349	1.86209	FBgn0034972
snRNA:U4:25F	-0.813903	2L:5565618-5565766	43.9204	24.9837	FBgn0041719
snoRNA:Psi28S-3091b	-0.813903	3R:1421085-1426891	66.8098	38.0041	FBgn0082978
Fer3HCH	0.813825	X:13001414-13002227	43.5949	76.634	FBgn0030449
l(1)G0045	-0.812483	X:5513166-5520085	2.50889	1.42857	FBgn0026702
CG13842	-0.812442	3R:18530072-18532912	1.4147	0.805557	FBgn0039009
CG5246	0.811094	3R:12961832-12962917	2.12865	3.7348	FBgn0038484
CG12278	0.811094	3R:16869814-16871533	0.769839	1.35071	FBgn0038847
Osi13	-0.810736	3R:2117623-2118491	3.22884	1.84073	FBgn0037422
CG9521	-0.810711	X:14733410-14827616	0.83346	0.475156	FBgn0030588
CG6084	0.809201	3L:11613632-11617481	676.058	1184.62	FBgn0086254
CG14445	-0.809042	X:6131349-6134427	7.04575	4.02144	FBgn0029851
CG15578	0.80873	X:4171579-4171994	103.608	181.487	FBgn0040905
CG31493	-0.80865	3R:2957396-2958268	38.8509	22.1806	FBgn0051493
Lcp1	0.808276	2R:4318138-4318737	5.27925	9.2446	FBgn0002531
CG4998	-0.808203	3L:16332098-16338348	1.27835	0.730057	FBgn0036612
Mgat1	-0.807884	2R:16444363-16449832	25.6723	14.6645	FBgn0034521
CG14879	-0.807664	3R:12171854-12174946	8.29498	4.73897	FBgn0038419
CG11626	0.807242	3R:15234896-15236987	1.38897	2.43051	FBgn0038705
CG13203	-0.806935	2R:7261483-7264614	3.43488	1.96336	FBgn0033628
CG15539	-0.806677	3R:26331708-26333702	25.2229	14.4199	FBgn0039782
CG2278	-0.80629	X:8061986-8063955	1.06226	0.607455	FBgn0030017
MstProx	0.805159	3R:3191571-3195027	48.4664	84.6873	FBgn0015770
CG17059	0.804908	2R:9107828-9115714	119.853	209.387	FBgn0040754
CR32028	0.804457	3L:8433160-8435480	0.865485	1.51156	FBgn0062463
CG12003	-0.804122	3L:1555362-1568608	5.30444	3.03791	FBgn0035234
CG16985	0.803968	3L:2595812-2600242	84.5015	147.531	FBgn0035355
Sb	-0.803318	3R:11954450-11971006	1.15678	0.662867	FBgn0003319
CG31820	0.803275	2L:16000536-16041047	1671.46	2916.79	FBgn0051820
amd	-0.803037	2L:19110158-19114110	2.88378	1.65281	FBgn0000075
CG7429	0.802349	2L:8041114-8041879	20.105	35.0619	FBgn0031979
CG31809	-0.802174	2L:16853618-16858453	0.853402	0.489413	FBgn0051809
CG32683	-0.802174	X:10304419-10348928	1.35917	0.779463	FBgn0052683
CG15126	0.802037	2R:15578349-15578511	240.702	419.679	FBgn0040729
CG32809	-0.801898	X:1569112-1586580	2.88367	1.65406	FBgn0023531
CG7342	-0.801878	3R:15429832-15432200	9.88538	5.67027	FBgn0038716
Cpr49Ac	0.801453	2R:8274471-8277562	16.0376	27.9512	FBgn0033725
CG14431	-0.801424	X:6852043-6862746	1.05556	0.605662	FBgn0029922
CG3731	0.801418	3R:10712197-10718109	447.832	780.487	FBgn0038271
CG1319	0.800958	3L:4292496-4293432	83.7531	145.92	FBgn0035529
CG34217	0.800552	2R:4115703-4116229	398.87	694.739	FBgn0085246
CG9447	-0.799595	2R:2760836-2763118	1.1148	0.640464	FBgn0033110
CG34451	-0.799595	3L:15681843-15685147	1.23665	0.710467	FBgn0085480
Mtk	0.798235	2R:11296350-11296621	83.2193	144.716	FBgn0014865
CG15734	0.798175	X:11980501-11981058	86.4021	150.245	FBgn0030374
CG3635	0.798038	2L:22175414-22183992	2.00806	3.49148	FBgn0032981
Cyp4p3	-0.797138	2R:5115285-5134752	26.0104	14.9687	FBgn0033397
CG17687	-0.796655	3L:13342325-13347949	2.74949	1.58283	FBgn0036348
CG7142	0.796595	3R:14100386-14108206	3.51518	6.10585	FBgn0038595
CG30026	0.796595	2R:7296080-7296936	31.023	53.8868	FBgn0050026
CG18563	0.795797	2L:17452923-17458775	4.16678	7.23369	FBgn0032639
CG9065	0.795656	X:14978053-14978688	168.432	292.376	FBgn0030610
kappaTry	0.793793	2R:7225301-7226282	47.1193	81.6872	FBgn0043471
RpL30	0.793471	2L:19008232-19009273	1577.37	2733.95	FBgn0086710
CG14079	0.793319	3L:19091262-19092130	3.44626	5.97256	FBgn0036849
CG7422	-0.792909	3L:7643682-7752224	8.44782	4.8759	FBgn0035815
CG33223	0.792117	X:8359790-8377918	30.8271	53.3805	FBgn0053223
CG32271	-0.791832	3L:3197859-3218920	5.45517	3.15096	FBgn0052271
Fer1	-0.791556	3R:2961927-2967701	5.1902	2.99849	FBgn0037475
tutl	-0.79147	2L:4283146-4321233	2.91823	1.68602	FBgn0010473
mfas	-0.791147	3R:7810583-7819037	169.552	97.9816	FBgn0260745
CheB42c	-0.790511	2R:2813206-2859139	30.9093	17.8699	FBgn0066292
Obp57a	-0.789398	2R:16392671-16393265	29.3565	16.9852	FBgn0043535
Cht4	-0.789222	2R:16952884-16954592	9.46212	5.47531	FBgn0022700
dpr10	-0.788697	3L:10140552-10179205	4.59591	2.66042	FBgn0052057
sca	-0.788368	2R:8668048-8689515	1.23507	0.715104	FBgn0003326
CG13427	-0.788368	2R:16426381-16426819	0.72854	0.421824	FBgn0034514
CG14607	-0.788368	3R:3068324-3069563	5.54425	3.21011	FBgn0037488
CG40204	-0.788368	U:497149-497545	0.887457	0.513837	FBgn0058204
CR40947	-0.788368	U:8131389-8131737	1.1769	0.681426	FBgn0085540
snoRNA:Psi28S-3327c	-0.788368	3L:13034855-13037012	22.9623	13.2952	FBgn0086601
CG42285	-0.788368	3R:4193339-4195642	1.51039	0.874515	FBgn0259181
CG42464	-0.788368	2L:3699492-3699819	51.5614	29.854	FBgn0259954
ph-d	-0.786471	X:2010898-2017164	0.669209	0.387981	FBgn0004860
CG1552	0.786404	X:10946368-10947549	46.5222	80.24	FBgn0030258
CG18231	-0.786024	3L:18593247-18611031	26.0042	15.0809	FBgn0036796
mRpS5	0.785609	3L:24530334-24536634	78.0761	134.589	FBgn0044510
CG11211	-0.784757	2R:2068423-2069131	57.258	33.2354	FBgn0033067
CG6592	-0.784264	3L:6053045-6056006	2.24021	1.30078	FBgn0035669
CCKLR-17D1	-0.784264	X:18601526-18620605	0.834463	0.484529	FBgn0259231
Tim8	0.783893	X:11262493-11263216	158.644	273.148	FBgn0027359
AttD	-0.783853	3R:13450989-13451810	12.589	7.31185	FBgn0038530
CG13248	-0.78383	3L:20400200-20403669	4.24293	2.46439	FBgn0036984
CG13220	0.783746	2R:7171920-7172605	147.135	253.307	FBgn0033608
djl	0.78348	3R:2886488-2887641	238.541	410.596	FBgn0037463
CG17085	0.783395	2L:10851331-10851898	3.58106	6.16363	FBgn0032309
CG34171	-0.783054	2L:18320100-18392575	8.83053	5.13173	FBgn0085200
CG13067	0.782961	3L:16264408-16265019	109.294	188.058	FBgn0036589
dpr9	-0.782586	3R:10882194-10902927	2.29864	1.33626	FBgn0038282
CG17776	0.782293	X:2078972-2079295	105.166	180.871	FBgn0040899
CG7255	0.781812	3L:15297468-15304295	7.99792	13.7507	FBgn0036493
Cyp6t3	-0.781415	2R:8078186-8079758	1.12505	0.654551	FBgn0033697
CG8909	-0.781377	X:15805012-15814812	3.70327	2.1546	FBgn0030706
CG16863	-0.781096	2L:13790962-13793264	1.57458	0.916289	FBgn0028931
CG3764	-0.781078	3L:16987810-16995374	5.71069	3.32323	FBgn0036684
CG6867	-0.780632	X:17823079-17933532	3.52693	2.05307	FBgn0030887
Scsalpha	0.780192	3L:3814184-3818383	203.656	349.751	FBgn0004888
CG6041	0.7801	X:5842222-5844241	14.7592	25.3452	FBgn0029826
CG11892	-0.779599	3R:21107269-21108964	121.981	71.0576	FBgn0039313
Ir62a	-0.779323	3L:1523411-1534034	0.698499	0.406974	FBgn0053971
Tdc2	-0.779322	2R:2561113-2580099	1.82173	1.06142	FBgn0050446
CG9084	0.779175	2R:7061324-7106718	8.63862	14.8252	FBgn0033582
Obp83g	0.779119	3R:1937391-1938019	76.2682	130.883	FBgn0046875
CG14193	0.778673	X:19084246-19085062	1.56695	2.68819	FBgn0030994
CG33626	0.778673	2R:8297583-8298201	0.639302	1.09676	FBgn0053626
HDC15381	0.778673	3R:20199175-20210770	0.841199	1.44312	FBgn0086610
SteXh:CG42398	-0.778587	U:6621520-6622252	5.08129	2.96208	FBgn0259817
Ama	0.778403	3R:2588314-2590983	2.57732	4.4207	FBgn0000071
CG15458	0.778145	X:20284674-20285198	90.2781	154.82	FBgn0040651
Cpr49Ae	0.777375	2R:8289719-8292620	900.625	1543.68	FBgn0033728
CG12001	-0.77733	3R:480549-483707	9.74595	5.68623	FBgn0037265
Sfp33A2	-0.776811	2L:11814825-11928570	118.411	69.1115	FBgn0259963
Sfp24Ba	-0.776341	2L:3662744-3691743	638.689	372.896	FBgn0259951
CG7276	0.776018	3L:15491301-15491921	41.801	71.58	FBgn0036499
lectin-46Cb	-0.77513	2R:5698889-5707556	76.7718	44.8605	FBgn0040092
CG34179	0.775081	2L:6046645-6050474	0.81301	1.39129	FBgn0085208
Sfp53D	-0.774603	2R:12632054-12632609	128.772	75.2735	FBgn0259967
CG17127	-0.774454	2L:10770866-10771370	20.2517	11.8393	FBgn0032299
CG40042	0.774197	2LHet:167979-169120	306.921	524.907	FBgn0058042
scu	0.774182	X:17985278-17986888	157.421	269.225	FBgn0021765
CG34114	-0.773872	3R:6819204-6875525	2.24438	1.31262	FBgn0083950
Ance-4	0.7738	2R:4927224-4929647	13.7085	23.4384	FBgn0033366
CG9747	-0.77303	3R:26011141-26016799	47.5708	27.8378	FBgn0039754
Ca-alpha1T	-0.772888	X:6001085-6040199	1.68734	0.987507	FBgn0029846
CG32333	-0.772368	3L:1275971-1294382	1.23124	0.720835	FBgn0052333
ncd	-0.772293	3R:25628918-25632849	8.05397	4.71549	FBgn0002924
CG14823	0.771992	3L:7059413-7062297	33.9056	57.8981	FBgn0035734
snoRNA:Psi18S-920	-0.77188	3L:11815951-11818773	80.9465	47.4066	FBgn0083015
CG14277	-0.771704	2L:8242666-8243429	35.8861	21.0194	FBgn0032008
CG42393	0.771515	3L:17945062-18052698	295.344	504.171	FBgn0259739
CG31659	-0.771247	2L:1358924-1359784	185.865	108.9	FBgn0051659
prd	-0.770835	2L:12082996-12085792	12.4648	7.30535	FBgn0003145
stet	-0.770098	3L:1475428-1489547	1.88949	1.10795	FBgn0020248
CCKLR-17D3	-0.769989	X:18658515-18668264	1.98774	1.16565	FBgn0030954
CG33510	0.769627	2L:21082888-21084287	1.89956	3.23843	FBgn0053510
CG12643	0.76935	X:10158256-10159290	40.2592	68.6218	FBgn0040942
Pbprp3	-0.769113	3R:1797869-1800967	69.1763	40.5911	FBgn0011281
CG6439	0.769112	3R:17842263-17845104	189.526	322.994	FBgn0038922
CG31664	-0.768916	2L:1824403-1826055	3.78288	2.22001	FBgn0051664
CG9981	0.768689	X:16293931-16297514	0.414915	0.706899	FBgn0030746
CG6149	-0.7686	3L:11427856-11428561	83.2426	48.8623	FBgn0036158
CG34456	-0.768468	3L:9355207-9360040	9.67278	5.67831	FBgn0085485
CR33319	0.768371	2L:20928823-20933700	292.481	498.197	FBgn0053319
CG5278	-0.768028	3R:18384582-18388293	21.0545	12.3636	FBgn0038986
CG4269	0.768006	2R:18486859-18487861	62.4804	106.399	FBgn0034741
CG7603	0.767773	3L:17459044-17459868	212.608	361.996	FBgn0036726
CG33460	0.765376	2R:11581596-11582737	3.13054	5.32132	FBgn0053460
tal-1A	0.764815	3R:9638837-9640372	10.9705	18.6405	FBgn0259730
CG14142	-0.764717	3L:11166613-11169992	2.01641	1.18679	FBgn0036143
CG13060	0.764173	3L:16312960-16313567	0.621288	1.05519	FBgn0036606
Est-6	-0.7638	3L:12181934-12183805	528.511	311.263	FBgn0000592
CG3857	-0.763089	X:1831730-1834040	10.6858	6.29642	FBgn0023520
CG6461	-0.762949	X:18399913-18406392	35.0077	20.6297	FBgn0030932
TwdlV	0.762731	3R:80501-81316	3.51314	5.96075	FBgn0037227
CG33259	-0.762542	3L:15400948-15401331	48.2808	28.4595	FBgn0036495
CG8394	-0.762293	2R:10086504-10088226	12.6597	7.46366	FBgn0033911
CG2772	0.762247	2L:3445996-3447591	8.98782	15.2445	FBgn0031533
CG8179	-0.762216	2R:11297676-11358613	3.37513	1.98995	FBgn0034020
Tpi	0.761693	3R:25958697-25960321	534.695	906.564	FBgn0086355
CG13010	0.761599	X:16572471-16572876	113.515	192.451	FBgn0030770
CG32582	0.761488	X:15729633-15730956	35.4998	60.1806	FBgn0052582
DopR2	-0.760145	3R:25456025-25485706	1.0596	0.62563	FBgn0015129
CG42541	-0.759471	X:3789079-3805808	0.656608	0.387867	FBgn0260658
CG42686	-0.759389	3R:18465529-18491109	1.3676	0.807907	FBgn0261572
CG4950	0.759329	3L:16259516-16261256	36.8777	62.423	FBgn0036587
CR32658	0.759281	X:11985296-11986103	878.188	1486.46	FBgn0040859
CG31639	0.759257	2L:6153839-6155088	789.082	1335.62	FBgn0051639
Mlc2	0.759082	3R:25997159-26000273	3644.03	6167.21	FBgn0002773
nord	-0.758738	2R:20130785-20144937	2.16848	1.2816	FBgn0050418
RpL18A	0.758686	2R:13429408-13434999	1377.52	2330.7	FBgn0010409
up	0.758604	X:13487609-13496536	728.078	1231.8	FBgn0004169
Mst87F	0.75847	3R:9652866-9653432	1848.48	3127.07	FBgn0002862
CG8193	-0.758452	2R:4929764-4932213	7.18574	4.24771	FBgn0033367
e(y)2b	0.758213	3R:2919759-2949907	50.3041	85.0841	FBgn0040670
CG8757	-0.757994	3L:13834373-13835340	1.67771	0.992062	FBgn0036380
CG4103	0.757373	2L:15008681-15009597	3.7626	6.36033	FBgn0028925
CG8520	0.756956	2R:8310489-8315366	58.619	99.0615	FBgn0033734
RpS28b	0.756597	X:9448651-9449254	2152.33	3636.36	FBgn0030136
CG8550	0.756054	2R:8359419-8361321	5.08297	8.58445	FBgn0033742
CG30088	0.755953	2R:11578656-11579768	1.86833	3.15513	FBgn0050088
zetaTry	0.755777	2R:7226690-7227633	20.3302	34.3283	FBgn0011556
CG14488	0.754867	2R:13652076-13655263	199.38	336.449	FBgn0034278
alphaPS4	-0.75476	2R:11146271-11180386	0.671049	0.397694	FBgn0034005
pncr013:4	0.754425	4:488141-489324	12.4813	21.0555	FBgn0041005
CG6234	0.754049	3R:8473781-8478635	1.2253	2.0665	FBgn0038071
CG16756	0.753954	X:5321549-5322248	129.823	218.934	FBgn0029765
Nek2	-0.753934	X:7783098-7785605	1.27699	0.757233	FBgn0029970
CG8303	-0.753614	2R:12482532-12492716	20.3134	12.0482	FBgn0034143
CG17325	-0.753254	2L:18813009-18813941	212.625	126.143	FBgn0040993
CG13606	-0.753246	3R:19998352-20009752	98.6579	58.5305	FBgn0039161
CG31008	0.752747	3R:26794863-26842569	158.192	266.553	FBgn0051008
Prp8	-0.752302	2R:8040575-8050496	5.54951	3.2945	FBgn0033688
CG15249	0.752204	X:9782322-9783193	0.999633	1.68375	FBgn0030161
Bro	-0.751842	3L:1647868-1648613	1.02416	0.608194	FBgn0013755
CG18538	-0.751842	2R:14166569-14244766	1.60599	0.953706	FBgn0034324
CG9876	-0.751842	2R:18977625-18981785	2.59799	1.5428	FBgn0034821
Nep5	-0.751774	3R:22853639-22889500	4.53729	2.69457	FBgn0039478
CG42326	-0.751112	2R:4460867-4471147	2.55344	1.51711	FBgn0259226
CG6553	0.750367	2R:9742241-9743257	14.799	24.8953	FBgn0033880
CG42370	0.750133	2L:6377766-6411306	7.03112	11.826	FBgn0259716
CG31267	0.750052	3R:12959918-12961005	21.6375	36.3912	FBgn0051267
CG10910	-0.749949	2R:13907753-13909911	10.7852	6.41315	FBgn0034289
CG5959	-0.749706	3R:21723197-21725313	1.55933	0.927372	FBgn0039387
Su(var)2-HP2	-0.749635	2R:10494658-10505550	5.27346	3.13641	FBgn0026427
CG3893	0.749413	3L:18893686-18894593	8.69202	14.6122	FBgn0036826
CG12464	0.749398	2R:9496177-9496683	178.807	300.591	FBgn0033861
CG2209	0.749195	X:12916230-12917225	43.1601	72.5459	FBgn0030441
CG9836	0.748971	3R:4648563-4649895	280.175	470.861	FBgn0037637
CG3706	0.748925	X:824963-828792	2.03818	3.42525	FBgn0040342
CG7058	-0.747726	X:18700726-18706035	1.37363	0.818055	FBgn0030961
mRpS17	0.747707	2R:20061186-20061958	62.3246	104.651	FBgn0034986
Acp53C14a	-0.747565	2R:12635564-12636077	2340.36	1393.94	FBgn0034152
CG2975	-0.747396	2L:2840123-2844513	8.21989	4.8964	FBgn0031468
CG13607	0.746809	3R:19939764-19941867	12.5351	21.0349	FBgn0039151
ymp	0.746376	3R:21344044-21434849	319.738	536.384	FBgn0261287
CG15577	0.746075	X:4170525-4171033	195.786	328.378	FBgn0040904
CG9486	0.745927	2L:6253122-6322251	18.5179	31.0555	FBgn0031791
mus308	-0.745851	3R:8530815-8538021	2.63644	1.57215	FBgn0002905
CG40198	0.745547	3RHet:2505273-2505998	67.6674	113.452	FBgn0058198
CG15296	0.745524	X:10384097-10479056	83.4387	139.892	FBgn0030215
CG6783	0.745307	3R:7385611-7392771	861.747	1444.57	FBgn0037913
CG31785	-0.745299	2L:18120026-18138210	0.998584	0.5957	FBgn0051785
Oatp58Dc	-0.745078	2R:18111185-18116073	21.8637	13.0447	FBgn0034716
Sfp78E	-0.744973	3L:21673185-21677142	135.363	80.768	FBgn0261059
CG15408	-0.744652	2L:3332910-3334723	25.6548	15.3111	FBgn0031523
CG17996	0.744578	2L:16729777-16730960	101.5	170.062	FBgn0032595
CG34366	-0.744425	2L:9373024-9384845	1.57678	0.941188	FBgn0085395
Obp99a	0.744387	3R:25497381-25498056	188.461	315.722	FBgn0039678
CG4038	-0.744225	2R:16979742-16988961	24.1446	14.4141	FBgn0011824
He	0.744094	2L:13970528-13972947	2.66946	4.47113	FBgn0028430
CG3301	-0.743575	3R:17099964-17101973	188.587	112.635	FBgn0038878
CG34331	0.742923	X:20016489-20017094	83.5938	139.899	FBgn0085360
CG11562	0.74289	2L:292465-293222	281.624	471.304	FBgn0031247
CG14457	0.742745	3L:22663055-22673134	3.18791	5.33451	FBgn0037174
CG17930	0.742693	3R:12153571-12155345	2.98557	4.99575	FBgn0038416
CG4847	-0.742663	2R:13399027-13401364	333.733	199.451	FBgn0034229
CG11151	0.742271	X:13630599-13638688	451.697	755.602	FBgn0030519
CG12560	0.742252	2L:8008320-8009477	29.1227	48.716	FBgn0031974
CG31954	0.742147	2L:3509057-3510082	0.678322	1.1346	FBgn0051954
CG32036	0.742147	3L:9481237-9482234	1.60831	2.69016	FBgn0052036
CG8589	-0.741482	2R:10187604-10189858	1.3587	0.812674	FBgn0033921
CG15152	0.741381	2L:18114546-18115220	32.8724	54.9553	FBgn0032665
Cpr47Ea	0.741002	2R:7137872-7140903	62.8405	105.028	FBgn0033597
CG13202	0.740876	2R:7242837-7243998	79.4386	132.757	FBgn0033623
CG6785	-0.740787	2L:12041048-12045200	1.90508	1.14002	FBgn0032399
CG7341	-0.740146	3L:18106064-18114107	4.10226	2.45593	FBgn0036777
in	-0.739351	3L:20360299-20363359	2.23108	1.33643	FBgn0001259
CG10039	0.739172	2L:4007689-4008999	20.8172	34.7484	FBgn0031581
Os-C	-0.738954	3R:3804680-3806044	63.4085	37.9927	FBgn0010401
RpS27	0.738528	3R:21071673-21073222	742.093	1238.16	FBgn0039300
Fmo-1	0.738352	2R:19850497-19852175	14.0699	23.4724	FBgn0034943
CG34293	0.737987	3R:22988845-22991297	32.9334	54.9279	FBgn0085322
CG34160	0.73774	2L:10544880-10627374	285.305	475.764	FBgn0250826
CG11425	0.737701	3L:22467894-22468892	7.38089	12.3078	FBgn0037167
CG17244	0.737016	3R:18802992-18803613	59.7916	99.6561	FBgn0039031
CG8386	0.736059	2R:11879914-11895160	72.2238	120.297	FBgn0034061
CG32547	-0.735901	X:18337842-18373574	1.16018	0.69662	FBgn0052547
lectin-30A	-0.735865	2L:9251471-9291798	425.321	255.387	FBgn0040097
CG15461	0.735512	X:20342673-20362133	140.716	234.291	FBgn0040649
CG41561	0.735452	U:4051663-4052829	32.5082	54.1235	FBgn0085692
CG15394	-0.735002	2L:2588853-2592775	170.137	102.221	FBgn0250835
CG2993	-0.73471	3R:3631716-3635710	8.09985	4.86752	FBgn0037521
CG42376	0.734086	X:148930-158028	82.2472	136.805	FBgn0259722
CG12502	-0.734078	3L:865395-870895	1.83407	1.10265	FBgn0035171
RpL38	0.733892	2R:403501-403961	1837.94	3056.72	FBgn0040007
CG12691	0.732371	X:4160129-4160702	53.9397	89.6137	FBgn0029701
vnd	0.73235	X:476731-491855	2.41989	4.02027	FBgn0003986
CG1707	0.731924	2R:3281050-3283453	106.913	177.566	FBgn0033162
CG13138	-0.731861	2L:10300221-10301955	0.757216	0.45594	FBgn0032211
NPFR76F	-0.731784	3L:20053095-20082082	0.702866	0.423237	FBgn0036934
cer	0.731437	2R:15283719-15284265	171.163	284.18	FBgn0034443
CG42657	0.73134	X:9582221-9583328	131.665	218.587	FBgn0261522
CG32061	0.731305	3L:10456915-10457735	97.0391	161.098	FBgn0052061
jhamt	-0.730882	2L:16365918-16366977	7.73218	4.65891	FBgn0028841
Takr86C	-0.730627	3R:6563313-6576950	1.22986	0.741163	FBgn0004841
Tace	-0.729974	3R:25826256-25829400	10.7409	6.47585	FBgn0039734
CG32266	0.729943	3L:3717196-3801288	18.6135	30.8718	FBgn0052266
CG1441	-0.72976	2R:5786522-5790788	12.9999	7.83901	FBgn0033464
CG8993	0.729019	3L:2372198-2373678	166.034	275.204	FBgn0035334
Acp1	0.728848	2L:7740551-7741542	859.367	1424.24	FBgn0014454
CG15209	0.72871	X:10726784-10741125	64.0675	106.17	FBgn0030237
mRpS6	0.728669	3L:4364554-4365243	27.7695	46.0172	FBgn0035534
CG1835	0.728583	X:20539354-20547951	163.035	270.15	FBgn0031127
CG15029	-0.728173	X:15077887-15081740	1.65171	0.997086	FBgn0030619
CR41597	0.727953	3LHet:898-1989	2.64281	4.37726	FBgn0085810
Acp26Aa	-0.727543	2L:5892882-5893896	865.935	522.965	FBgn0002855
Nos	-0.727308	2L:10804268-10842603	1.94891	1.1772	FBgn0011676
CG9993	-0.726967	2R:16737650-16739626	8.30239	5.01608	FBgn0034553
CG9822	-0.726967	2R:17234379-17235356	0.757562	0.457698	FBgn0034623
CG14686	-0.726967	3R:6605296-6606543	1.85896	1.12313	FBgn0037832
Gr59f	-0.726967	2R:19430032-19431408	1.44586	0.873549	FBgn0041234
CheA7a	-0.726238	X:7272205-7272832	85.1115	51.448	FBgn0029948
Rab9Fa	0.726045	X:10832481-10858079	0.765201	1.26572	FBgn0052671
CR42652	0.725948	3R:2645854-2646153	402.053	664.991	FBgn0261504
CG4702	0.724702	3R:7947298-7953919	4.65094	7.68595	FBgn0037992
Syt14	-0.724496	3R:141309-144791	2.72483	1.64909	FBgn0261086
CG13838	0.724403	3R:18867962-18868392	176.228	291.166	FBgn0039041
BM-40-SPARC	0.723155	3R:22694953-22697738	205.408	339.085	FBgn0026562
CG10730	-0.72315	2L:20066369-20075479	16.2592	9.84939	FBgn0032843
snRNA:U1:21D	0.722885	2L:901490-901662	37.9732	62.6739	FBgn0003916
Obp50b	0.722881	2R:10258686-10260511	7.22963	11.9323	FBgn0050073
CG7231	0.72286	2L:7892315-7986786	17.4628	28.8214	FBgn0031968
CG2147	0.722819	X:8134716-8135519	83.4041	137.651	FBgn0030025
CG11263	-0.721787	3L:12999923-13000981	0.953217	0.577979	FBgn0036330
CG13024	0.72177	3L:16801521-16812642	13.6298	22.4783	FBgn0036665
CG14817	0.72161	X:1770737-1771231	103.531	170.725	FBgn0026089
CG34298	0.721347	3R:25825516-25826125	138.826	228.885	FBgn0085327
CG32576	0.720729	X:16179985-16182554	38.078	62.7531	FBgn0052576
CG31714	-0.720681	2L:10064321-10087884	1.04838	0.636168	FBgn0032180
CG10300	0.720329	3R:19537250-19544079	2.73472	4.5056	FBgn0039107
RhoGAP100F	-0.719984	3R:27638796-27670966	1.36441	0.828337	FBgn0039883
ckd	0.719585	3L:3258154-3267845	8.74191	14.3954	FBgn0035427
Cyp4ac2	-0.71939	2L:5218259-5271353	2.98776	1.81463	FBgn0031694
CG13365	0.719281	X:514747-515241	53.2016	87.5891	FBgn0029529
CheB38c	-0.719279	2L:20820088-20820867	15.5964	9.47326	FBgn0032888
CG33773	0.719252	3R:26861067-26861846	27.2623	44.8827	FBgn0053773
CG34363	-0.719239	2R:6211163-6282677	1.40512	0.853496	FBgn0085392
CG42239	0.718966	2R:13460334-13469011	62.8003	103.369	FBgn0250868
CG34005	0.7183	2R:13935616-13937230	5.31671	8.74728	FBgn0054005
CG34027	-0.717776	3R:20929391-20934754	1.10566	0.672281	FBgn0054027
rho-6	0.717664	2L:12130595-12133339	10.7975	17.7567	FBgn0032415
CG31053	-0.717285	3R:23750914-23763571	1.14164	0.69439	FBgn0051053
TpnC73F	-0.716766	3L:17039263-17041490	120.361	73.2349	FBgn0010424
fas	-0.716562	2R:9510592-9636882	2.2796	1.38724	FBgn0000633
CG5932	0.71655	3L:20446392-20457448	32.7036	53.7402	FBgn0036996
CG5377	0.715238	3R:18292626-18293849	11.2305	18.4377	FBgn0038974
beat-VI	-0.715022	3R:24243925-24298931	1.80559	1.09996	FBgn0039584
CG42650	0.714655	3R:3217203-3217979	140.176	230.042	FBgn0261502
CG10631	-0.714532	2L:19742813-19756867	2.09258	1.27522	FBgn0032817
CG12768	-0.714367	3L:22903590-22916632	2.17545	1.32588	FBgn0037206
CG31897	-0.714367	2L:8442446-8445660	2.42137	1.47576	FBgn0051897
Atg8a	0.714122	X:10658910-10662368	500.516	821.089	FBgn0052672
CG15117	-0.71408	2R:15009734-15016746	50.1591	30.5767	FBgn0034417
CG15576	0.714076	X:4145907-4146730	103.076	169.088	FBgn0029700
CG30263	-0.713406	2R:17563825-17572505	0.736129	0.448949	FBgn0050263
CG33668	0.713257	X:6312849-6313467	5.82279	9.54647	FBgn0053668
CG14416	0.713084	X:2766022-2766854	3.01248	4.93837	FBgn0040352
CG17917	0.712758	3R:2167689-2168595	13.1174	21.4985	FBgn0037431
mun	-0.712566	3R:16204717-16225765	2.56185	1.56333	FBgn0261342
Pgk	0.711461	2L:2745101-2748522	211.975	347.101	FBgn0250906
Sod2	0.711356	2R:12660420-12661413	329.443	539.411	FBgn0010213
CG9920	0.711229	3R:9923014-9923802	1104.09	1807.61	FBgn0038200
tok	-0.711191	3R:20545418-20574855	21.9035	13.379	FBgn0004885
CG30083	0.711107	2R:11599101-11600149	11.7144	19.1772	FBgn0050083
CG7834	0.710591	3R:25627447-25628675	185.276	303.2	FBgn0039697
CG2611	0.710438	2L:20650193-20656176	18.3658	30.052	FBgn0032871
proPO-A1	-0.710245	2R:13761451-13813097	6.2638	3.82854	FBgn0261362
Mst84Da	0.710096	3R:3191571-3195027	1127.7	1844.82	FBgn0004172
CG14787	0.710086	X:1354839-1355700	5.44928	8.91448	FBgn0027793
CG13117	0.709925	2L:9716189-9746483	71.5959	117.111	FBgn0032140
CG30056	0.709132	2R:8416560-8451691	106.837	174.659	FBgn0050056
CG6295	0.7091	3R:22831620-22832777	121.353	198.386	FBgn0039471
CG11722	0.709027	3R:5868979-5871245	89.8559	146.888	FBgn0037777
CG31627	0.708636	2L:21173266-21174179	58.0574	94.8808	FBgn0051627
piwi	-0.708617	2L:10975534-10987416	1.61412	0.987693	FBgn0004872
CG11113	-0.708315	2R:3285730-3295326	39.2596	24.0283	FBgn0033165
Eno	0.708101	2L:1724973-1729629	573.129	936.294	FBgn0000579
CG15347	0.70809	X:8352526-8354927	131.661	215.086	FBgn0030040
Cyp4d20	-0.708041	3L:2466902-2503584	12.9306	7.91546	FBgn0035344
GABA-B-R2	-0.707919	3R:17596054-17601562	7.62706	4.66931	FBgn0027575
CG30381	0.707644	2R:3814181-3818381	8.75866	14.3041	FBgn0050381
CG8768	0.707572	2R:8578812-8580193	31.6477	51.6824	FBgn0033769
CG33340	0.707139	3R:20188868-20192071	1079.41	1762.2	FBgn0053340
TwdlS	0.70684	3R:22462435-22463182	1.54423	2.52054	FBgn0039443
CG6870	0.706757	2L:17591446-17592298	31.1108	50.7769	FBgn0032652
CG1909	-0.706636	4:603736-609976	26.5909	16.2935	FBgn0039911
CG7430	0.70641	3L:17840015-17842483	215.577	351.766	FBgn0036762
CG34010	0.706104	2L:8009602-8010635	1.72437	2.81312	FBgn0054010
Osi14	-0.705906	3R:2124853-2126472	1.61914	0.992623	FBgn0040279
st	-0.70565	3L:16412893-16516025	11.4734	7.03509	FBgn0003515
Npc2e	-0.705174	3R:5879119-5879982	5.13411	3.1491	FBgn0051410
CG16782	0.704997	X:3353048-3354273	240.983	392.837	FBgn0029659
CG12594	-0.704637	3R:7547525-7558201	3.19319	1.95933	FBgn0037941
CG11893	-0.704614	3R:21115610-21117088	42.1992	25.8937	FBgn0039316
CG34261	0.704545	3L:21187848-21201194	4.68065	7.62773	FBgn0085290
Glu-RIB	-0.70439	3L:9245077-9279887	1.28751	0.790148	FBgn0028431
CG42402	-0.70439	3RHet:2381981-2446597	3.36097	2.06263	FBgn0259821
CG9541	-0.703976	2L:8970800-8973396	2.38222	1.46239	FBgn0032083
CG13477	0.703421	3L:14665967-14740971	436.963	711.534	FBgn0036438
Karl	0.703377	X:11682878-11686287	16.0637	26.1567	FBgn0030334
Npc2h	0.702794	3R:26571200-26572010	148.752	242.116	FBgn0039801
CG18081	0.701346	3L:15825559-15828486	68.5367	111.442	FBgn0036537
Mgstl	0.701274	X:20913515-20915134	307.008	499.177	FBgn0025814
CG8343	-0.701118	2R:2067224-2067875	247	151.929	FBgn0040502
nimC4	0.700941	2L:14039842-14089437	26.6186	43.2703	FBgn0260011
CG42540	-0.700884	3L:4556086-4592295	13.4087	8.24896	FBgn0260657
CG31788	0.700785	2L:18257492-18257892	3322.23	5399.91	FBgn0051788
CG3769	0.70067	2L:9435509-9436842	0.795488	1.29288	FBgn0032119
CG10035	0.70067	3R:8207372-8208412	0.527903	0.85798	FBgn0038028
CG8750	0.700479	3L:13835687-13836117	249.679	405.74	FBgn0040812
GABA-B-R1	-0.700402	2L:15017153-15032191	2.34562	1.44349	FBgn0260446
CG31606	0.699954	2L:8134246-8159575	11.0542	17.9569	FBgn0051606
CG5687	-0.699559	3L:1933630-1938740	22.4642	13.8326	FBgn0035293
CG12479	0.69949	X:14045722-14045947	186.642	303.094	FBgn0040871
CG40530	0.699046	U:8029208-8030316	191.217	310.428	FBgn0085494
CG1208	0.698864	3R:1655783-1664504	23.8946	38.7863	FBgn0037386
CG42247	-0.698743	3L:14897336-14936008	1.35133	0.832564	FBgn0259099
Ubc84D	0.698419	3R:3344618-3345080	225.158	365.37	FBgn0017456
CG8247	0.69751	2R:4802032-4810256	0.56319	0.913327	FBgn0033348
CG6904	0.697206	3R:10967561-10973329	82.8193	134.28	FBgn0038293
CG9642	0.697059	2R:12934349-12936012	1.31853	2.1376	FBgn0034183
Reg-2	0.696849	3L:605164-606558	62.7194	101.666	FBgn0016715
CG18437	-0.69642	3R:23488555-23502617	3.95417	2.44013	FBgn0039536
CG3734	0.695997	3R:15194716-15228870	15.4608	25.0465	FBgn0038700
alpha-Man-II	-0.695723	3R:5238270-5242986	8.72321	5.38571	FBgn0011740
CG30154	0.695604	2R:16420878-16421441	55.5531	89.9717	FBgn0050154
Cpr47Ed	-0.695259	2R:7148817-7149295	2.36529	1.4608	FBgn0033601
Obp58d	-0.695259	2R:18594452-18595219	0.705642	0.435803	FBgn0034770
Cpr67Fb	-0.695259	3L:10887290-10887723	57.3418	35.4142	FBgn0036110
Or92a	-0.695259	3R:16330509-16331908	0.620701	0.383344	FBgn0038798
CG13053	-0.695259	3L:16252132-16252560	0.672232	0.41517	FBgn0040801
CG30403	-0.695259	2R:17596954-17599114	1.062	0.65589	FBgn0050403
CheB93b	-0.695259	3R:17234848-17235582	2.61156	1.61289	FBgn0051438
CheA29a	-0.695259	2L:8477348-8478088	0.663187	0.409584	FBgn0053194
CG33724	-0.695259	2R:14527698-14528307	0.628619	0.388234	FBgn0053724
CG33920	-0.695259	3R:26865097-26872546	1.25724	0.776468	FBgn0053920
snoRNA:Psi28S-3327b	-0.695259	3L:13034855-13037012	14.3515	8.86345	FBgn0082966
snoRNA:Me28S-C3420a	-0.695259	2R:8086523-8088333	90.5555	55.9269	FBgn0083988
CG17075	-0.695221	2L:252588-271732	0.985579	0.608708	FBgn0031239
CG10332	0.695	2R:19488436-19489296	94.4432	152.893	FBgn0260455
l(3)mbn	-0.694399	3L:6091221-6121719	9.9922	6.17485	FBgn0002440
CG17323	0.694368	2L:18823573-18826553	24.7137	39.9911	FBgn0032713
CG16965	0.693933	2L:11981713-11984250	9.86509	15.9586	FBgn0032387
CG11796	0.693894	3L:20429356-20432968	161.367	261.034	FBgn0036992
l(1)G0136	0.693808	X:15628312-15631109	103.358	167.186	FBgn0026666
Gr89a	0.693784	3R:12323538-12324681	0.505677	0.817943	FBgn0038440
CG30087	0.693784	2R:11579952-11581256	0.710352	1.14901	FBgn0050087
hoip	0.693642	2L:9699790-9700459	48.9661	79.1959	FBgn0015393
CG10340	0.693483	3R:12439133-12440109	77.8611	125.916	FBgn0022344
heph	-0.693291	3R:27676703-27819000	43.9965	27.2093	FBgn0011224
CG14806	0.692949	X:1774329-1783808	48.042	77.6639	FBgn0029594
CG15293	0.692733	2L:14108056-14109304	216.379	349.743	FBgn0028526
oho23B	0.69234	2L:2856069-2857041	1250.3	2020.36	FBgn0015521
CG5662	0.692093	X:15104430-15105413	26.5357	42.8718	FBgn0030620
C15	0.691765	3R:17325976-17338054	1.5374	2.48329	FBgn0004863
CG7529	0.691215	3L:21490648-21500643	21.7963	35.1933	FBgn0037090
CG31804	0.690266	2L:17363495-17364351	76.8749	124.044	FBgn0051804
CG42488	0.689999	3R:21308887-21314810	5.48541	8.84952	FBgn0259991
CG13869	-0.689883	2R:16123739-16126904	18.2533	11.3153	FBgn0034486
CG32806	0.689777	X:1683622-1684449	70.7003	114.042	FBgn0052806
CG3996	-0.68968	3R:6065339-6075693	5.11053	3.16848	FBgn0037800
Hdc	-0.688832	2R:6128373-6134977	5.43872	3.37394	FBgn0005619
CG32588	0.688826	X:15099843-15100669	36.1232	58.2295	FBgn0052588
CG11912	0.688759	2L:305940-346549	41.2088	66.4243	FBgn0031248
CG33136	0.68839	2R:14552466-14553250	119.04	191.83	FBgn0053136
CG15172	0.688318	2L:19023163-19023650	182.829	294.612	FBgn0032740
CG30116	-0.688046	2R:14344466-14385516	4.54361	2.82019	FBgn0028496
CG7322	0.687803	X:18749951-18751484	75.9075	122.274	FBgn0030968
mRpL55	0.6874	3R:14920109-14920619	53.5304	86.2043	FBgn0038678
CG14495	0.686874	2R:13935616-13937230	11.7945	18.9867	FBgn0034293
yellow-f	0.686263	3R:8811785-8818923	5.72889	9.21841	FBgn0041710
PGRP-SA	0.686244	X:11455561-11464355	13.6031	21.8885	FBgn0030310
CG14372	-0.686118	3R:9281636-9291828	1.74631	1.08537	FBgn0038156
CG13776	0.685869	2L:7012326-7014737	15.5128	24.955	FBgn0031880
alpha-Man-IIb	-0.685834	3R:11629973-11658354	3.54847	2.20589	FBgn0026616
scpr-A	0.685693	3R:7066904-7067845	295.399	475.142	FBgn0037889
Uro	-0.684997	2L:7780084-7781415	90.2987	56.1664	FBgn0003961
CG40045	0.684772	3L:24021620-24028960	187.5	301.397	FBgn0058045
CG16704	0.684681	2L:3692126-3692588	184.092	295.9	FBgn0031558
CG42404	-0.68437	3R:11077402-11082807	1.5285	0.951148	FBgn0259823
CG14153	0.684266	3L:10633492-10654113	18.6632	29.9896	FBgn0036094
CG9013	0.684065	2R:12833103-12842660	9.9285	15.9517	FBgn0034169
CG15563	0.683625	3R:27057406-27058058	7.0876	11.3839	FBgn0039832
noe	0.683368	3L:17389123-17414612	51.3004	82.3826	FBgn0026197
Sirt7	-0.683015	3R:24881653-24884926	3.94951	2.46	FBgn0039631
CG12907	0.682982	2R:6211163-6282677	215.155	345.421	FBgn0250840
CG42565	0.682977	2R:18547987-18548894	17.2718	27.7289	FBgn0260767
CG2918	-0.682954	X:2165317-2169111	53.1894	33.1311	FBgn0023529
CG4297	-0.682907	2L:460514-465607	1.99497	1.24268	FBgn0031258
CG15267	-0.682874	2L:15248884-15256304	1.34108	0.835392	FBgn0028862
na	-0.682768	X:14161685-14170664	1.88665	1.17532	FBgn0002917
CG13044	-0.682581	3L:16295590-16296260	301.055	187.572	FBgn0036599
Tom20	0.682346	3L:19994186-19995407	265.789	426.524	FBgn0036928
CG9902	-0.682202	X:16437584-16441519	1.72723	1.07643	FBgn0030757
r	-0.681886	X:16549411-16564165	2.77203	1.72794	FBgn0003189
CG1773	0.681714	2R:5593788-5596227	9.10478	14.6045	FBgn0033439
Ccp84Ag	-0.681453	3R:2512449-2513762	2.47909	1.54581	FBgn0004777
CG7166	-0.681304	3L:21613099-21618747	3.02482	1.88628	FBgn0037107
FucTC	0.681264	X:22410737-22412570	7.08406	11.3596	FBgn0044872
CG1074	0.681246	3R:259714-261897	12.1567	19.4935	FBgn0037250
CG4896	-0.680915	2L:1177705-1184021	16.6213	10.3679	FBgn0031319
CG34255	0.680845	3L:18862555-18865643	25.3139	40.5801	FBgn0085284
Dh	-0.680766	3R:5463903-5475982	7.3511	4.58587	FBgn0012344
CG31806	0.680502	2L:16973090-16993999	187.412	300.364	FBgn0051806
CG14160	0.680124	3L:10075852-10082500	3.44455	5.51913	FBgn0036066
CG11192	0.679968	2R:16241609-16242558	5.3205	8.524	FBgn0034507
Tsp29Fa	0.679581	2L:8933963-8936096	57.0139	91.3177	FBgn0032074
CG6290	-0.679317	X:18329747-18334614	9.064	5.66011	FBgn0030921
CG5693	0.679167	2L:18006678-18007216	218.652	350.11	FBgn0040989
CG5853	0.679151	2L:9938864-9947442	37.1041	59.411	FBgn0032167
tos	-0.679139	2L:18677202-18683717	0.836642	0.522515	FBgn0015553
CG15170	0.679137	2L:18987726-18990233	1.14014	1.82557	FBgn0032733
CG13720	0.679137	3L:4498974-4500537	0.423393	0.677929	FBgn0035555
CG40127	0.679122	2R:74990-75661	429.074	687.019	FBgn0058127
CG13891	0.678896	3L:433229-433891	99.7121	159.631	FBgn0035139
CG14118	0.678758	3L:12885812-12887596	2.59701	4.15719	FBgn0036323
sti	-0.678676	3L:12501089-12507889	1.26044	0.787447	FBgn0002466
CG12519	-0.678185	3L:19465592-19466152	2.9735	1.85829	FBgn0036872
pnr	0.67806	3R:11851818-11866639	1.49679	2.39485	FBgn0003117
Acp29AB	-0.677992	2L:8392465-8393239	114.89	71.8101	FBgn0015583
CG32191	0.677433	3L:17799550-17801895	4.01653	6.4236	FBgn0052191
GIIIspla2	0.677329	X:8051579-8053072	28.9834	46.3495	FBgn0030013
CG11000	0.677296	3R:1628877-1633991	1.50113	2.40051	FBgn0037380
CG31760	-0.677125	2L:12142783-12170217	5.63734	3.52565	FBgn0051760
CG9689	0.676956	X:9776015-9776992	22.0009	35.1743	FBgn0030159
CG30065	0.67654	2R:9302479-9326550	143.182	228.848	FBgn0050065
CG14298	0.676198	3R:14701429-14702928	23.515	37.5751	FBgn0038654
CG3759	0.67595	2L:9416592-9426344	3.56328	5.69287	FBgn0032116
PGRP-SD	0.675846	3L:7643682-7752224	44.9604	71.8258	FBgn0035806
CG1688	-0.675665	2R:5653866-5694370	4.5908	2.87404	FBgn0027589
Dh44-R1	-0.675515	2R:10265629-10272864	2.41327	1.51097	FBgn0033932
CG3078	-0.67545	X:2148431-2153896	2.44746	1.53244	FBgn0023524
Obp19b	-0.675377	X:20287748-20288836	53.0149	33.1963	FBgn0031110
CG8436	0.675199	3R:5084690-5086122	10.7401	17.15	FBgn0037670
HDC02577	0.675147	2L:14802333-14803299	166.648	266.097	FBgn0250834
Mst35Ba	0.67512	2L:14879044-14881652	184.353	294.361	FBgn0013300
CG34132	0.67505	2L:7883467-7887489	204.929	327.2	FBgn0083968
CG17664	0.675033	2R:19491248-19492665	27.4683	43.8568	FBgn0034883
CG4975	-0.674968	2R:13614442-13620492	5.19977	3.25685	FBgn0034266
CG1625	-0.674956	2R:5710581-5714988	3.06298	1.9185	FBgn0033447
faf	-0.674855	3R:27602755-27615753	8.25847	5.17306	FBgn0005632
sPLA2	0.674841	2R:3328197-3333266	36.806	58.7579	FBgn0033170
trpl	-0.67447	2R:5641201-5653023	51.4724	32.2507	FBgn0005614
scramb2	-0.674233	3L:3042374-3046810	17.7795	11.1418	FBgn0035390
CG13579	-0.67399	2R:20342830-20376970	0.937455	0.58757	FBgn0035010
CG14715	0.673925	3R:7499940-7503835	44.3847	70.8117	FBgn0037930
CG12853	0.673824	2R:10821029-10821431	1015.46	1619.96	FBgn0040747
CG2556	0.672899	X:12391193-12410580	9.61969	15.3364	FBgn0030396
CG31781	0.672311	2L:16869486-16878300	45.3555	72.2796	FBgn0051781
CG17652	0.672232	2L:1731357-1732356	11.9135	18.9847	FBgn0031361
CG32667	0.672203	X:11033789-11034296	419.992	669.26	FBgn0052667
CG5931	-0.672026	3L:15953907-15960956	5.03743	3.16161	FBgn0036548
CG30376	0.67182	2R:4151117-4151931	579.123	922.59	FBgn0050376
CG15373	0.671619	X:17938103-17942663	1.05486	1.68024	FBgn0030889
CG8064	-0.671011	3R:14109383-14114499	3.25978	2.04736	FBgn0038597
CG18746	0.670391	3R:3614000-3615904	1.08134	1.72096	FBgn0042103
HSPC300	0.670226	2R:19915473-19916325	69.7497	110.994	FBgn0061198
CG9483	0.670194	2L:8866766-8867686	55.3897	88.1409	FBgn0032072
CG6000	0.670124	3R:19880139-19883029	37.3383	59.4131	FBgn0039145
CG33143	-0.669403	2R:18501834-18523435	2.15043	1.35212	FBgn0053143
CG12038	-0.668786	3L:993987-995703	9.2284	5.80499	FBgn0035179
wrapper	-0.668165	2R:18267016-18270191	2.35547	1.48231	FBgn0025878
Tpl94D	0.66806	3R:18792022-18793183	211.668	336.327	FBgn0051281
Obp44a	0.667578	2R:4018917-4022596	1406.63	2234.29	FBgn0033268
CG3556	-0.667424	X:4424263-4427872	3.69414	2.32594	FBgn0029708
CG42351	0.667383	2R:14642499-14648577	38.2978	60.8242	FBgn0259682
CG13722	0.667311	3L:4485408-4488013	13.2083	20.9762	FBgn0035553
para	-0.66714	X:16357637-16421448	0.677787	0.426839	FBgn0260993
CG34377	-0.667062	3R:18137664-18144439	1.75854	1.10751	FBgn0085406
CG42284	-0.667062	2R:18710230-18716429	0.888926	0.559835	FBgn0259179
CG34210	0.666994	2R:19239106-19239667	109.584	173.994	FBgn0085239
CG13905	0.666876	3L:902897-903614	76.4351	121.351	FBgn0035176
CG42446	0.666822	3R:12183865-12185830	70.0777	111.253	FBgn0259917
CG14407	0.66628	X:14731503-14732230	130.624	207.297	FBgn0030584
CG15043	0.666169	X:18387433-18388197	118.236	187.623	FBgn0030929
CG33970	-0.665987	3R:22144079-22187711	33.0428	20.8255	FBgn0053970
CG31646	-0.665842	2L:5626281-5658553	6.37179	4.01627	FBgn0051646
CG10252	0.665805	3R:19520935-19522000	1321.77	2096.92	FBgn0039104
Ugt86Dj	0.665769	3R:6999296-7001117	2.79839	4.4394	FBgn0040250
Orc6	0.665664	2R:5730202-5733964	2.04694	3.24706	FBgn0023180
CG9691	0.665533	X:9778474-9779079	570.266	904.529	FBgn0030160
Sox100B	-0.665097	3R:26891078-26909129	0.86908	0.548082	FBgn0024288
CG34015	0.664687	X:16341600-16342335	40.9267	64.878	FBgn0054015
Cpr62Bb	0.664506	3L:1832635-1835166	63.4055	100.499	FBgn0035280
retn	-0.664497	2R:19520134-19542343	6.54486	4.12921	FBgn0004795
CG4238	-0.664337	2L:2010117-2030536	12.0182	7.58324	FBgn0031384
CG3590	0.664144	3R:12840339-12853760	15.7731	24.9945	FBgn0038467
gcm	0.663895	2L:9578535-9581742	1.51725	2.40387	FBgn0014179
CG12851	-0.66378	2R:20836169-20842004	2.87073	1.81207	FBgn0035086
CG34454	0.6637	3L:231736-232302	72.2375	114.434	FBgn0085483
RpL13A	0.66339	3R:1450185-1451679	1653.3	2618.5	FBgn0037351
CG30105	0.663195	2R:13478470-13479999	9.82391	15.557	FBgn0050105
CG15211	0.663129	X:10666576-10680978	23.1049	36.587	FBgn0030234
Lsd-1	0.663129	3R:19589578-19593174	62.7056	99.2951	FBgn0039114
CG12901	0.662997	2R:6211163-6282677	205.821	325.891	FBgn0033513
sli	-0.662919	2R:11758923-11809623	1.82123	1.15029	FBgn0003425
CG42287	0.662858	2R:9948983-10028403	50.7642	80.3707	FBgn0259183
Ccn	-0.662785	3L:17683112-17743688	4.48493	2.83294	FBgn0052183
nod	0.662515	X:11474850-11479787	1.5381	2.43456	FBgn0002948
CG15270	-0.66173	2L:15075644-15096915	3.96647	2.50728	FBgn0028879
Cyp18a1	-0.661575	X:18582569-18586778	3.18535	2.01374	FBgn0010383
CG5984	-0.660212	3R:23072581-23073540	2.12409	1.34409	FBgn0039500
Cks85A	0.660062	3R:4526703-4541600	76.4014	120.726	FBgn0037613
RpL23	0.660054	2R:18741900-18746317	2092.35	3306.21	FBgn0010078
yip2	0.659903	2L:9915254-9918165	141.88	224.167	FBgn0040064
raptor	-0.659635	X:5976739-5985472	1.36872	0.866451	FBgn0029840
GstE3	0.659323	2R:14288221-14288972	161.679	255.347	FBgn0063497
GV1	0.659233	3L:1810588-1822903	55.4868	87.6272	FBgn0027790
CG6055	0.658936	2L:7466545-7472493	14.9901	23.6682	FBgn0031918
CG3117	0.658642	2L:2846083-2847197	9.05703	14.2974	FBgn0031471
CG16712	0.658401	2L:3696239-3696661	2617.81	4131.77	FBgn0031561
CG4019	0.658189	2R:19495097-19502269	179.8	283.742	FBgn0034885
CG12520	-0.65806	3L:12894474-12895674	3.13118	1.98432	FBgn0036324
CG10881	0.656845	3R:16225971-16310273	47.4474	74.807	FBgn0038796
CG13253	-0.656571	3L:20702504-20712298	8.00877	5.08064	FBgn0037015
CG17147	-0.65573	3L:20216988-20218393	2.35911	1.49746	FBgn0260393
CG11842	-0.655652	3R:24878401-24879635	34.7639	22.0677	FBgn0039629
Ccp84Ad	0.655239	3R:2518519-2519180	2.69069	4.23751	FBgn0004780
mdy	0.654619	2L:16802020-16826991	13.2943	20.9279	FBgn0004797
CG32523	-0.65412	X:21076336-21152198	19.2719	12.2466	FBgn0052523
CG5399	0.654027	3R:11520991-11522286	275.646	433.744	FBgn0038353
CG12262	0.653905	3L:7643682-7752224	150.987	237.566	FBgn0035811
CG7203	0.653883	2L:7752167-7753156	5265.35	8284.48	FBgn0031942
tj	-0.653438	2L:19464579-19467758	0.852436	0.541947	FBgn0000964
CG13670	-0.653438	3L:8313862-8315383	0.954626	0.606916	FBgn0035873
CG34198	0.653387	2R:15570028-15570478	46.3446	72.8934	FBgn0085227
CG32073	0.653142	3L:11100127-11100457	9.01976	14.1844	FBgn0052073
CG10226	-0.652517	3L:6227416-6232689	13.3011	8.46174	FBgn0035695
CG14974	0.652421	3L:3620431-3621017	247.055	388.322	FBgn0040694
l(1)G0255	0.652341	X:6571293-6577729	137.048	215.4	FBgn0028336
CG31769	0.652142	2L:14109596-14110739	126.149	198.242	FBgn0051769
CG32202	0.65176	3L:18675333-18675955	13.6099	21.3823	FBgn0052202
spn-E	-0.650864	3R:11663158-11670138	1.14755	0.730872	FBgn0003483
CG40228	0.650852	3LHet:2188915-2190733	21.239	33.3473	FBgn0063670
Cyp9c1	-0.65075	2R:20502943-20526110	10.6277	6.76927	FBgn0015040
CG12679	0.650297	X:20246790-20247549	111.621	175.188	FBgn0031103
CG17333	0.650254	X:10741528-10742567	101.671	159.567	FBgn0030239
ocn	0.650194	3R:25862716-25863452	1492.43	2342.19	FBgn0041102
CG40245	-0.650171	U:687848-688458	3.30677	2.10709	FBgn0058245
CG9395	-0.65015	2L:13349822-13355073	3.76556	2.39947	FBgn0032506
CG33666	0.650128	X:6359243-6418356	29.294	45.9714	FBgn0053666
CG42260	-0.649925	2R:18631376-18684614	1.30738	0.833211	FBgn0259145
Cyp4d1	0.649911	X:2053174-2056160	4.24011	6.65304	FBgn0005670
CG17760	-0.649848	2R:8513337-8516124	2.80663	1.7888	FBgn0033756
CG31562	0.649753	3R:2010176-2011160	2.24703	3.52536	FBgn0051562
CG9505	-0.649455	2L:6367883-6370195	4.70092	2.99694	FBgn0031805
CG42535	0.649241	3L:10623199-10624035	40.1414	62.9556	FBgn0260643
CG31678	-0.649219	2L:20656427-20675941	18.2812	11.6566	FBgn0051678
alpha-catenin-related	-0.648834	2R:19845629-19849148	4.89006	3.11886	FBgn0029105
HmgZ	0.64874	2R:17585055-17591993	116.525	182.687	FBgn0010228
RpS14b	0.648412	X:7828936-7829832	373.284	585.101	FBgn0004404
CG42365	0.648365	2R:17554251-17557560	4.368	6.84637	FBgn0259711
InR	-0.648276	3R:17398220-17445043	0.743567	0.474427	FBgn0013984
Sodh-1	0.647979	3R:2878056-2880264	233.446	365.804	FBgn0024289
CG34021	0.647935	2R:8224491-8225046	162.848	255.17	FBgn0054021
Iris	-0.647713	2L:1129234-1134120	13.0255	8.31407	FBgn0031305
CG6094	0.647111	2L:10507116-10510461	36.2876	56.8274	FBgn0032261
CG10824	-0.646754	3R:16966462-17038409	7.54651	4.82007	FBgn0038865
Mur18B	-0.646388	X:19107289-19108971	599.85	383.231	FBgn0030999
CG15056	-0.64608	X:18309545-18310945	8.48255	5.42047	FBgn0030918
lva	-0.645996	X:3849577-3858787	10.2905	6.57614	FBgn0029688
CG6188	-0.645929	3R:8500330-8501806	116.679	74.5674	FBgn0038074
mRpL52	0.645829	2R:3561225-3561908	66.975	104.792	FBgn0033208
VAChT	-0.645763	3R:14531173-14558068	4.41792	2.82374	FBgn0015323
Lerp	-0.645432	3R:22668183-22688843	13.031	8.33072	FBgn0051072
sim	-0.645375	3R:8883480-8903950	0.907859	0.580418	FBgn0004666
app	-0.645334	3L:12199337-12259889	17.1867	10.9882	FBgn0260941
ade5	0.645313	X:12651792-12654651	120.131	187.894	FBgn0020513
TpnC47D	0.645009	2R:7161539-7162796	198.896	311.024	FBgn0010423
CG6067	0.644945	X:5849662-5858190	37.4885	58.62	FBgn0029828
Ir76b	-0.644633	3L:20101583-20104634	0.709011	0.453523	FBgn0036937
CG31189	0.644579	3R:16869814-16871533	51.5243	80.547	FBgn0051189
CG4050	-0.643916	2R:17011232-17015995	4.71976	3.02052	FBgn0020312
CG14315	-0.643859	3R:13984491-13985145	9.13978	5.84945	FBgn0038568
CG32937	-0.643782	3R:5551738-5552738	6.26469	4.0096	FBgn0052937
CG3009	-0.643752	X:4544053-4560730	8.95916	5.73428	FBgn0029720
CG9406	0.643366	2R:17016083-17030702	103.538	161.724	FBgn0034592
CG42268	-0.643113	3L:9727111-9753495	17.1232	10.9645	FBgn0259163
CG15818	0.643084	2L:7410933-7412229	39.2258	61.2575	FBgn0031910
RpL35	0.643039	X:5566474-5567589	1469.56	2294.88	FBgn0029785
CG12377	0.64256	3L:22496093-22498333	45.6129	71.2061	FBgn0037168
CG3520	-0.642407	2R:19284288-19289832	1.88368	1.20677	FBgn0034859
smp-30	0.64238	3R:10567308-10619350	407.976	636.811	FBgn0038257
mRpL30	0.642224	X:4541909-4543865	60.0527	93.7262	FBgn0029718
CG2811	0.64221	2R:20825861-20827993	35.2067	54.9478	FBgn0035082
CG7950	0.641905	3R:25882574-25883853	40.2066	62.7379	FBgn0260468
CG3257	-0.641616	2R:20004311-20014153	10.4561	6.70233	FBgn0034978
CG13476	0.641603	3L:14665967-14740971	214.268	334.271	FBgn0036441
CG12470	0.641393	X:173735-364670	272.507	425.066	FBgn0040371
Obp49a	-0.640721	2R:8577563-8578460	44.1749	28.3334	FBgn0050052
Tim9a	0.640304	X:13279282-13279915	137.576	214.433	FBgn0030480
shd	-0.640269	3L:14607557-14615305	4.99447	3.20442	FBgn0003388
Dab	-0.64015	3L:16706241-16717089	3.57568	2.29432	FBgn0000414
Trh	-0.640117	3L:1190383-1193169	2.49256	1.59938	FBgn0035187
CG1288	0.640003	3R:3033094-3034137	532.793	830.269	FBgn0250845
CG1732	0.639993	4:650318-655978	23.0296	35.8875	FBgn0039915
CG30203	-0.639845	2R:8198193-8201340	1.32296	0.849054	FBgn0050203
Bili	-0.639776	3R:20957011-20962431	3.30703	2.12249	FBgn0039282
Sfp26Ac	-0.639692	2L:5884350-5884774	190.056	121.987	FBgn0259959
CG32132	-0.639611	3L:13865036-13865732	3.85494	2.47443	FBgn0052132
CG42611	-0.639508	X:9253876-9394162	2.11902	1.36027	FBgn0261260
Pbprp4	-0.639501	3R:3075520-3077679	9.75433	6.26164	FBgn0011282
Pbprp2	-0.639229	X:20290639-20292009	486.394	312.292	FBgn0011280
Ac3	-0.63907	2L:21632598-21647967	5.04533	3.23974	FBgn0023416
CG32856	0.638923	3R:11789588-11791073	18.1032	28.1897	FBgn0052856
CG13082	0.638681	2L:19538428-19539910	35.9015	55.8952	FBgn0032803
CG33218	0.638173	X:2224191-2224859	143.884	223.935	FBgn0053218
CG8360	0.637956	2L:8213178-8214135	98.949	153.977	FBgn0032001
CG5793	0.63782	3R:16953445-16954630	154.097	239.771	FBgn0038858
CG14438	-0.637419	X:6650354-6664330	2.22414	1.42982	FBgn0029899
mGluRA	-0.636365	4:957467-967451	1.55833	1.00253	FBgn0019985
Cpr78Ca	-0.636365	3L:21285318-21285767	1.41918	0.913001	FBgn0037067
CG12590	-0.636365	3R:976629-995849	0.938454	0.603738	FBgn0037294
CheB93a	-0.636365	3R:17233173-17233905	5.12729	3.29855	FBgn0038888
CG30158	-0.636365	2R:2779267-2810118	3.18737	2.05054	FBgn0050158
CG32652	0.636323	X:12305092-12306214	855.343	1329.51	FBgn0052652
kek3	-0.636095	2L:15552722-15583579	1.47425	0.948608	FBgn0028370
Sfp24F	-0.635936	2L:4441428-4442060	153.388	98.7089	FBgn0259958
CG42594	-0.635822	X:4788721-4799339	0.77525	0.498931	FBgn0260971
Acp53Ea	-0.635347	2R:12637306-12637827	2659.42	1712.1	FBgn0015584
tobi	0.634476	3R:21165973-21172634	151.621	235.373	FBgn0261575
CG13946	0.634384	2L:776535-776892	51.7453	80.3229	FBgn0040725
Cyp304a1	0.634087	3R:8775763-8793434	2.73252	4.24074	FBgn0038095
CG34420	-0.633858	3L:11843744-11856547	2.07223	1.33545	FBgn0085449
CG31816	0.633807	2L:16542545-16543263	225.398	349.739	FBgn0051816
CG3797	-0.633064	3L:19052868-19055902	9.42261	6.07575	FBgn0036842
RpL21	0.632918	2L:22247110-22247833	2085.06	3233.31	FBgn0032987
CG14290	0.632835	3R:14752812-14754396	388.485	602.389	FBgn0038662
SP2353	-0.632807	2R:11919464-11933442	2.08729	1.34613	FBgn0034070
CG31847	-0.63263	2L:13496084-13500427	12.5109	8.06951	FBgn0051847
Cpr11A	-0.632418	X:12381005-12383484	2.77306	1.78888	FBgn0030394
gfA	-0.632163	X:19222593-19242477	4.41226	2.84683	FBgn0086778
CG13042	-0.632065	3L:16301097-16301515	9.47521	6.1139	FBgn0036602
CG8891	0.631897	2L:4977323-4979377	20.8563	32.3189	FBgn0031663
CG3795	0.631825	X:1602970-1604196	20.0206	31.0224	FBgn0025378
CG18327	0.631276	2R:10052559-10055738	54.2431	84.019	FBgn0033904
CG1077	-0.631128	3R:1993239-1996032	2.27151	1.46665	FBgn0037405
CG8500	-0.631122	3R:5610407-5616939	7.56149	4.88226	FBgn0037754
Mip	-0.630781	3L:17338046-17342762	6.47574	4.18221	FBgn0036713
CG17124	0.630559	2L:10744074-10756316	58.6149	90.7456	FBgn0032297
CG5195	-0.630359	3L:20446392-20457448	3.56861	2.30538	FBgn0036995
CG31010	0.630325	3R:26530480-26531815	78.8057	121.984	FBgn0051010
CG33511	0.630154	2L:21081126-21082494	18.2443	28.2372	FBgn0053511
CG11784	0.630145	2R:5009629-5019486	38.3512	59.357	FBgn0033381
CG13822	-0.63006	3R:19503079-19504145	15.3391	9.91134	FBgn0039098
CG6602	-0.630051	3L:6065243-6068340	67.6688	43.7244	FBgn0035673
Tg	-0.62998	2L:8011406-8026901	8.58622	5.54829	FBgn0031975
CG31106	-0.62976	3R:21042020-21044430	25.9064	16.7429	FBgn0051106
CG40451	0.629606	3RHet:1813574-1824026	151.961	235.106	FBgn0067318
Ssb-c31a	0.629444	2L:8211346-8211938	66.6905	103.168	FBgn0015299
CG10137	-0.628985	2L:19526685-19532992	4.11448	2.66055	FBgn0032800
CG17219	0.628951	2L:3029250-3035348	5.88091	9.09447	FBgn0031494
beat-IIb	-0.628916	3R:13057974-13073598	3.65045	2.36061	FBgn0038494
CG15638	0.628658	2L:13502655-13549323	108.801	168.22	FBgn0028943
CG3355	-0.628559	2L:4651402-4652877	0.711121	0.459969	FBgn0031619
Prx2540-2	0.627765	2R:6306222-6307278	338.113	522.441	FBgn0033518
Gmap	-0.627731	X:15380954-15404822	16.755	10.8437	FBgn0027287
skap	0.62764	3R:4764404-4770726	277.819	429.241	FBgn0037643
Rab26	-0.627556	3L:21311873-21327290	3.92708	2.54189	FBgn0086913
fs(1)N	-0.627468	X:1216557-1223487	1.94373	1.2582	FBgn0004650
CG11347	0.627279	3L:4406947-4420266	112.331	173.511	FBgn0035542
CG7164	0.627269	2L:7781502-7782627	178.529	275.763	FBgn0031946
CG13545	-0.627087	2R:19045235-19045636	4.65377	3.01323	FBgn0034828
gogo	-0.627087	3L:20261958-20288231	0.810103	0.524527	FBgn0052227
CG33307	-0.627087	2L:13835566-13898715	35.233	22.8127	FBgn0053307
snoRNA:Psi28S-291	-0.627087	3R:7045989-7050897	16.9923	11.0022	FBgn0065064
CG42330	-0.626922	3L:8224913-8274251	1.31247	0.849899	FBgn0259232
snoRNA:291	0.626671	3R:24637825-24645411	54.2193	83.7144	FBgn0065070
Lcp2	0.62667	2R:4321471-4322080	0.497031	0.767413	FBgn0002533
Sgs8	0.62667	3L:11502066-11502494	0.410953	0.63451	FBgn0003378
Mdr50	0.62667	2R:10134470-10140102	1.4621	2.25748	FBgn0010241
snoRNA:Me18S-A1576	0.62667	2L:9893804-9895003	13.7243	21.1902	FBgn0025881
CG15336	0.62667	X:8041981-8042529	0.68143	1.05213	FBgn0030009
CG15047	0.62667	X:18422744-18423269	0.9958	1.53751	FBgn0030938
CG13982	0.62667	2L:6412314-6423308	1.05336	1.62638	FBgn0031811
Cpr47Ec	0.62667	2R:7146821-7147344	2.7733	4.28197	FBgn0033600
CG17049	0.62667	2R:9280034-9280723	2.24319	3.46348	FBgn0033832
CG11582	0.62667	3L:4283067-4283478	0.411715	0.635686	FBgn0035525
CG13721	0.62667	3L:4497207-4497658	0.53679	0.828803	FBgn0035554
Gr66a	0.62667	3L:8298435-8300080	0.602261	0.92989	FBgn0035870
CG13738	0.62667	3L:13966219-13966573	2.26274	3.49366	FBgn0036390
Cpr76Bb	0.62667	3L:19512794-19513391	1.68096	2.5954	FBgn0036879
CG4115	0.62667	3R:8185732-8188975	39.6341	61.1949	FBgn0038017
CG17801	0.62667	3R:13631626-13632807	0.426213	0.658072	FBgn0038550
CG14300	0.62667	3R:14519009-14519417	0.894637	1.38132	FBgn0038643
CG15036	0.62667	X:7318626-7318845	1.11318	1.71875	FBgn0040922
snRNA:U6atac:29B	0.62667	2L:8384466-8392398	13.4255	20.7289	FBgn0041717
CG18744	0.62667	3R:3622797-3624493	2.23631	3.45286	FBgn0042101
CR30029	0.62667	2R:7133621-7134161	0.507385	0.783401	FBgn0050029
CG30126	0.62667	2R:14916539-14916761	1.59536	2.46323	FBgn0050126
CG31235	0.62667	3R:14142727-14154661	1.16298	1.79563	FBgn0051235
CG33270	0.62667	3L:11571386-11571653	2.6708	4.12371	FBgn0053270
CG33271	0.62667	3L:11570268-11570535	0.890267	1.37457	FBgn0053271
CG34023	0.62667	3R:3245989-3246420	0.40086	0.618927	FBgn0054023
snoRNA:U49:66Db	0.62667	3L:8594101-8595492	26.9391	41.5938	FBgn0060291
snoRNA:Me28S-G3081a	0.62667	2R:13586601-13590827	84.2926	130.147	FBgn0063381
snoRNA:U27:54Eb	0.62667	2R:13586601-13590827	64.071	98.9253	FBgn0063387
snoRNA:Me18S-G1620	0.62667	2L:9893804-9895003	93.0586	143.682	FBgn0063389
snmRNA:331	0.62667	3R:3300564-3300674	123.121	190.099	FBgn0065099
snoRNA:Or-CD4	0.62667	2R:10509110-10512013	360.281	556.272	FBgn0082919
snoRNA:Me28S-A992	0.62667	2R:10509110-10512013	69.9643	108.025	FBgn0082941
snoRNA:Me18S-A1061	0.62667	2R:10509110-10512013	46.3732	71.6001	FBgn0082952
snoRNA:Psi28S-2444	0.62667	2R:15329853-15331014	30.8206	47.5869	FBgn0082987
snoRNA:Psi28S-2442a	0.62667	3R:1421085-1426891	17.2218	26.5903	FBgn0082989
snoRNA:Psi28S-1153	0.62667	2R:9445043-9445191	9.24639	14.2764	FBgn0083006
snoRNA:Psi18S-640g	0.62667	2L:20417060-20423034	7.94827	12.2721	FBgn0083020
snoRNA:Psi18S-525j	0.62667	2L:20417060-20423034	3.21795	4.96851	FBgn0083029
snoRNA:Psi18S-301	0.62667	3R:16400627-16400765	6.07504	9.37984	FBgn0083039
CG34446	0.62667	2R:18535082-18535268	107.253	165.598	FBgn0085475
snoRNA:Me28S-A2113	0.62667	2L:19008232-19009273	294.277	454.363	FBgn0086039
snoRNA:Or-aca5	0.62667	2R:4982802-4985972	11.558	17.8455	FBgn0086672
CG42620	0.62667	U:8502213-8502369	5.66685	8.74959	FBgn0261335
Naam	-0.626351	3R:15497182-15524272	8.02149	5.19642	FBgn0051216
Obp57d	0.626077	2R:16435871-16437597	0.652728	1.0074	FBgn0043536
rad50	-0.626039	2R:18308543-18312979	2.94347	1.90723	FBgn0034728
CG15506	0.625661	3R:25544400-25548111	14.8925	22.9779	FBgn0039686
Muc68E	-0.625394	3L:11960679-11966079	3.76099	2.43804	FBgn0053265
Elongin-C	0.625321	2R:15332589-15333797	212.066	327.123	FBgn0023211
ana3	-0.625249	2R:8232590-8238583	2.01952	1.30927	FBgn0033718
ppk10	-0.624556	2L:10450133-10452201	3.72174	2.41399	FBgn0065110
CG31790	-0.624292	2L:18666891-18670039	1.04663	0.678991	FBgn0051790
CG7966	0.624174	3R:8875119-8877172	45.6682	70.3897	FBgn0038115
Pp1-Y2	0.623919	YHet:279994-291785	16.6489	25.6569	FBgn0046698
CG13296	-0.623874	3L:6156256-6157782	1.23153	0.799169	FBgn0035687
CG5010	0.623795	X:17043070-17044680	184.1	283.684	FBgn0260747
CG11781	0.62359	3R:20848994-20850727	72.6864	111.988	FBgn0039259
hiw	-0.623243	X:14904715-14957440	1.5781	1.02452	FBgn0030600
[truncated: 12,795 more rows]
